# Supplementary material
Source: Preprints.org preprint supplement (doi:10.20944/preprints202104.0378.v1)
Supplement: Supplementary file 1 [file supplementary]

## Sheet: csv-Stewardshi-set new
Title	Authors	PMID	Citation	First Author	Journal/Book	Publication Year	Create Date	PMCID	NIHMS ID	DOI	link	district	country	AMR TYPE	AMR type	AMR CONTEXT	Context	study design	output	additional comments
Prevalence, Clinical Features and Antibiotic Susceptibility of Group A Streptococcal Skin Infections in School Children in Urban Western and Northern Uganda	Chang AY, Scheel A, Dewyer A, Hovis IW, Sarnacki R, Aliku T, Okello E, Bwanga F, Sable C, Maurer TA, Beaton AZ.	31568247	Pediatr Infect Dis J. 2019 Dec;38(12):1183-1188. doi: 10.1097/INF.0000000000002467.	Chang AY	Pediatr Infect Dis J	2019	2019-10-01			10.1097/INF.0000000000002467			uganda	ANTIBACTERIAL	antibacterial	HUMAN	human	field study	surveillance
Phenotypic and genotypic analyses of antimicrobial resistant bacteria in livestock in Uganda	Okubo T, Yossapol M, Maruyama F, Wampande EM, Kakooza S, Ohya K, Tsuchida S, Asai T, Kabasa JD, Ushida K.	30260584	Transbound Emerg Dis. 2019 Jan;66(1):317-326. doi: 10.1111/tbed.13024. Epub 2018 Oct 22.	Okubo T	Transbound Emerg Dis	2019	2018-09-28			10.1111/tbed.13024		wakiso, mpigi	uganda	ANTIBACTERIAL	antibacterial	VETERINARY	veterinary	field study	resistance genes	PCR for antimicrobial resistance genes revealed that 83.3% (50/60) of AMP-resistant strains harbored blaTEM as a beta-lactamase gene while blaSHV and blaOXA were not detected
Impact of treatment and re-treatment with artemether-lumefantrine and artesunate-amodiaquine on selection of Plasmodium falciparum multidrug resistance gene-1 polymorphisms in the Democratic Republic of Congo and Uganda	Baraka V, Mavoko HM, Nabasumba C, Francis F, Lutumba P, Alifrangis M, Van Geertruyden JP.	29390014	PLoS One. 2018 Feb 1;13(2):e0191922. doi: 10.1371/journal.pone.0191922. eCollection 2018.	Baraka V	PLoS One	2018	2018-02-02	PMC5794077		10.1371/journal.pone.0191922	https://www.ncbi.nlm.nih.gov/pmc/articles/PMC5794077/		multicountry	ANTIMALARIAL	antimalarial	HUMAN	human	field study	resistance genes	randomised control trail, n(uganda) = 134. Prevalence of Pfmdr1 N86Y, Y184F and D1246Y alleles and haplotypes , selection for Pfmdr1 184F
Diversity and Antimicrobial Resistance Genotypes in Non-Typhoidal Salmonella Isolates from Poultry Farms in Uganda	Odoch T, Sekse C, L'Abee-Lund TM, HÃ¸gberg Hansen HC, Kankya C, Wasteson Y.	29438292	Int J Environ Res Public Health. 2018 Feb 13;15(2):324. doi: 10.3390/ijerph15020324.	Odoch T	Int J Environ Res Public Health	2018	2018-02-14	PMC5858393		10.3390/ijerph15020324	https://www.ncbi.nlm.nih.gov/pmc/articles/PMC5858393/		uganda	ANTIBACTERIAL	antibacterial	VETERINARY	veterinary	field study	resistance genes	characterise (subtype), seven genes (blaTEM-1, cmlA, tetA, qnrS, sul1, dhfrI, dhfrVII) in 31 (57.4%)
Milk Hygiene in Rural Southwestern Uganda: Prevalence of Mastitis and Antimicrobial Resistance Profiles of Bacterial Contaminants of Milk and Milk Products	Ssajjakambwe P, Bahizi G, Setumba C, Kisaka SM, Vudriko P, Atuheire C, Kabasa JD, Kaneene JB.	28246573	Vet Med Int. 2017;2017:8710758. doi: 10.1155/2017/8710758. Epub 2017 Jan 26.	Ssajjakambwe P	Vet Med Int	2017	2017-03-02	PMC5299203		10.1155/2017/8710758	https://www.ncbi.nlm.nih.gov/pmc/articles/PMC5299203/	kiruhura	uganda	ANTIBACTERIAL	antibacterial	VETERINARY	veterinary	field study	surveillance
Additive Bayesian networks for antimicrobial resistance and potential risk factors in non-typhoidal Salmonella isolates from layer hens in Uganda	Hartnack S, Odoch T, Kratzer G, Furrer R, Wasteson Y, L'AbÃ©e-Lund TM, Skjerve E.	31234834	BMC Vet Res. 2019 Jun 24;15(1):212. doi: 10.1186/s12917-019-1965-y.	Hartnack S	BMC Vet Res	2019	2019-06-26	PMC6591809		10.1186/s12917-019-1965-y	https://www.ncbi.nlm.nih.gov/pmc/articles/PMC6591809/		uganda	ANTIBACTERIAL	antibacterial	VETERINARY	veterinary	laboratory study	surveillance
African isolates show a high proportion of multiple copies of the Plasmodium falciparum plasmepsin-2 gene, a piperaquine resistance marker	Leroy D, Macintyre F, Adoke Y, Ouoba S, Barry A, Mombo-Ngoma G, Ndong Ngomo JM, Varo R, Dossou Y, Tshefu AK, Duong TT, Phuc BQ, Laurijssens B, Klopper R, Khim N, Legrand E, MÃ©nard D.	30967148	Malar J. 2019 Apr 10;18(1):126. doi: 10.1186/s12936-019-2756-4.	Leroy D	Malar J	2019	2019-04-11	PMC6457011		10.1186/s12936-019-2756-4	https://www.ncbi.nlm.nih.gov/pmc/articles/PMC6457011/		multicountry	ANTIMALARIAL	antimalarial	HUMAN	human	laboratory study	resistance genes	prevalence P. falciparum kelch13 (0 %), Pfmdr1 (27.4% in Uganda), Pfpm2 (> 30% in uganda.
Nasopharyngeal carriage, spa types and antibiotic susceptibility profiles of Staphylococcus aureus from healthy children less than 5â€‰years in Eastern Uganda	Kateete DP, Asiimwe BB, Mayanja R, Mujuni B, Bwanga F, Najjuka CF, KÃ¤llander K, Rutebemberwa E.	31791276	BMC Infect Dis. 2019 Dec 2;19(1):1023. doi: 10.1186/s12879-019-4652-5.	Kateete DP	BMC Infect Dis	2019	2019-12-04	PMC6889221		10.1186/s12879-019-4652-5		iganga, mayuge	uganda	ANTIBACTERIAL	antibacterial	HUMAN	human	field study	resistance genes	characterisation (genotyping) spa types t064, t037 (MRSA) and t645, t4353 (MSSA) are prevalent, and SCCmec types I and IV.
Epidemiology and antibiotic susceptibility of Vibrio cholerae associated with the 2017 outbreak in Kasese district, Uganda	Iramiot JS, Rwego IB, Kansiime C, Asiimwe BB.	31664972	BMC Public Health. 2019 Oct 29;19(1):1405. doi: 10.1186/s12889-019-7798-6.	Iramiot JS	BMC Public Health	2019	2019-10-31	PMC6819361		10.1186/s12889-019-7798-6	https://www.ncbi.nlm.nih.gov/pmc/articles/PMC6819361/	kasese	uganda	ANTIBACTERIAL	antibacterial	HUMAN	human	field study	surveillance
Antimicrobial resistance in pathogenic aerobic bacteria causing surgical site infections in Mbarara regional referral hospital, Southwestern Uganda	Hope D, Ampaire L, Oyet C, Muwanguzi E, Twizerimana H, Apecu RO.	31754237	Sci Rep. 2019 Nov 21;9(1):17299. doi: 10.1038/s41598-019-53712-2.	Hope D	Sci Rep	2019	2019-11-23	PMC6872727		10.1038/s41598-019-53712-2	https://www.ncbi.nlm.nih.gov/pmc/articles/PMC6872727/	mbarara	uganda	ANTIBACTERIAL	antibacterial	HUMAN	human	field study	surveillance
Bacterial Aetiology and Antibiotic Susceptibility Profile of Post-Operative Sepsis among Surgical Patients in a Tertiary Hospital in Rural Eastern Uganda	George M, Iramiot JS, Muhindo R, Olupot-Olupot P, Nanteza A.	30370374	Microbiol Res J Int. 2018;24(2):MRJL.41690. doi: 10.9734/MRJI/2018/41690. Epub 2018 Jun 20.	George M	Microbiol Res J Int	2018	2018-10-30	PMC6203322	NIHMS992076	10.9734/MRJI/2018/41690	https://www.ncbi.nlm.nih.gov/pmc/articles/PMC6203322/	kampala	uganda	ANTIBACTERIAL	antibacterial	HUMAN	human	field study	surveillance
Artemisinin-Resistant Plasmodium falciparum with High Survival Rates, Uganda, 2014-2016	Ikeda M, Kaneko M, Tachibana SI, Balikagala B, Sakurai-Yatsushiro M, Yatsushiro S, Takahashi N, Yamauchi M, Sekihara M, Hashimoto M, Katuro OT, Olia A, Obwoya PS, Auma MA, Anywar DA, Odongo-Aginya EI, Okello-Onen J, Hirai M, Ohashi J, Palacpac NMQ, Kataoka M, Tsuboi T, Kimura E, Horii T, Mita T.	29553316	Emerg Infect Dis. 2018 Apr;24(4):718-726. doi: 10.3201/eid2404.170141.	Ikeda M	Emerg Infect Dis	2018	2018-03-20	PMC5875287		10.3201/eid2404.170141	https://www.ncbi.nlm.nih.gov/pmc/articles/PMC5875287/	gulu	uganda	ANTIMALARIAL	antimalarial	HUMAN	human	field study	resistance genes	prevalence/incidence, 5 (2.6%) isolates harbored nonsynonymous mutations at propel- ler domains in PfKelch13, Among these, mutation in PfKelch13 was observed in only 1 isolate.
Antibiotic-Resistant Escherichia coli and Class 1 Integrons in Humans, Domestic Animals, and Wild Primates in Rural Uganda	Weiss D, Wallace RM, Rwego IB, Gillespie TR, Chapman CA, Singer RS, Goldberg TL.	30171005	Appl Environ Microbiol. 2018 Oct 17;84(21):e01632-18. doi: 10.1128/AEM.01632-18. Print 2018 Nov 1.	Weiss D	Appl Environ Microbiol	2018	2018-09-02	PMC6193383		10.1128/AEM.01632-18		kibale national park, bwindi impenetrable	uganda	ANTIBACTERIAL	antibacterial	ONEHEALTH	onehealth	field study	resistance genes	prevalence of class 1 integrons 33.2% of phenotypically resistant E. coli. 11 genes
Isolation and Antibiotic Susceptibility Testing of Haemophilus influenzae from Nasopharynx of Children under Five Years Attending Maternal and Child Health Clinic in Mbarara Regional Referral Hospital	Omoding D, Bazira J.	30944683	Can J Infect Dis Med Microbiol. 2019 Mar 3;2019:6542919. doi: 10.1155/2019/6542919. eCollection 2019.	Omoding D	Can J Infect Dis Med Microbiol	2019	2019-04-05	PMC6421742		10.1155/2019/6542919	https://www.ncbi.nlm.nih.gov/pmc/articles/PMC6131813/	mbarara	uganda	ANTIBACTERIAL	antibacterial	HUMAN	human	field study	surveillance
Changing Molecular Markers of Antimalarial Drug Sensitivity across Uganda	Asua V, Vinden J, Conrad MD, Legac J, Kigozi SP, Kamya MR, Dorsey G, Nsobya SL, Rosenthal PJ.	30559133	Antimicrob Agents Chemother. 2019 Feb 26;63(3):e01818-18. doi: 10.1128/AAC.01818-18. Print 2019 Mar.	Asua V	Antimicrob Agents Chemother	2019	2018-12-19	PMC6395896		10.1128/AAC.01818-18	https://www.ncbi.nlm.nih.gov/pmc/articles/PMC6395896/		uganda	ANTIMALARIAL	antimalarial	HUMAN	human	field study	resistance genes	prevalence of drug resistance-mediating polymorphisms in putative transporters , K13 polymorphisms, parasites with increased pfmdr1 and plasmepsin2 gene copy numbers , drug resistance-mediating polymorphisms in folate pathway enzymes
Species, antibiotic susceptibility profiles and van gene frequencies among enterococci isolated from patients at Mulago National Referral Hospital in Kampala, Uganda	Kateete DP, Edolu M, Kigozi E, Kisukye J, Baluku H, Mwiine FN, Najjuka CF.	31151413	BMC Infect Dis. 2019 May 31;19(1):486. doi: 10.1186/s12879-019-4136-7.	Kateete DP	BMC Infect Dis	2019	2019-06-02	PMC6545014		10.1186/s12879-019-4136-7	https://www.ncbi.nlm.nih.gov/pmc/articles/PMC6545014/	kampala	uganda	ANTIBACTERIAL	antibacterial	HUMAN	human	field study	surveillance	prevalence of vanA (15.8%) or vanB (7.9%) genes in enterococci (VRE)
Prevalence and antimicrobial susceptibility patterns of bacteria from milkmen and cows with clinical mastitis in and around Kampala, Uganda	Kateete DP, Kabugo U, Baluku H, Nyakarahuka L, Kyobe S, Okee M, Najjuka CF, Joloba ML.	23667611	PLoS One. 2013 May 7;8(5):e63413. doi: 10.1371/journal.pone.0063413. Print 2013.	Kateete DP	PLoS One	2013	2013-05-14	PMC3646745		10.1371/journal.pone.0063413	https://www.ncbi.nlm.nih.gov/pmc/articles/PMC3646745/	kampala	uganda	ANTIBACTERIAL	antibacterial	ONEHEALTH	onehealth	field study	surveillance
Changing Antimalarial Drug Sensitivities in Uganda	Rasmussen SA, Ceja FG, Conrad MD, Tumwebaze PK, Byaruhanga O, Katairo T, Nsobya SL, Rosenthal PJ, Cooper RA.	28923866	Antimicrob Agents Chemother. 2017 Nov 22;61(12):e01516-17. doi: 10.1128/AAC.01516-17. Print 2017 Dec.	Rasmussen SA	Antimicrob Agents Chemother	2017	2017-09-20	PMC5700361		10.1128/AAC.01516-17	https://www.ncbi.nlm.nih.gov/pmc/articles/PMC5700361/	tororo	uganda	ANTIMALARIAL	antimalarial	HUMAN	human	field study	surveillance
Comparative Efficacy of Artemether-Lumefantrine and Dihydroartemisinin-Piperaquine for the Treatment of Uncomplicated Malaria in Ugandan Children	Yeka A, Wallender E, Mulebeke R, Kibuuka A, Kigozi R, Bosco A, Kyambadde P, Opigo J, Kalyesubula S, Senzoga J, Vinden J, Conrad M, Rosenthal PJ.	30418593	J Infect Dis. 2019 Mar 15;219(7):1112-1120. doi: 10.1093/infdis/jiy637.	Yeka A	J Infect Dis	2019	2018-11-13			10.1093/infdis/jiy637	https://academic.oup.com/jid/article/219/7/1112/5174239		uganda	ANTIMALARIAL	antimalarial	HUMAN	human	field study	resistance genes	selection for pfcrt or pfmdr1, prevalence of pfcrt 76T and pfmdr1 86Y and 1246Y
Helicobacter pylori from Peptic Ulcer Patients in Uganda Is Highly Resistant to Clarithromycin and Fluoroquinolones: Results of the GenoType HelicoDR Test Directly Applied on Stool	Angol DC, Ocama P, Ayazika Kirabo T, Okeng A, Najjingo I, Bwanga F.	28555193	Biomed Res Int. 2017;2017:5430723. doi: 10.1155/2017/5430723. Epub 2017 May 7.	Angol DC	Biomed Res Int	2017	2017-05-31	PMC5438841		10.1155/2017/5430723		kampala	uganda	ANTIBACTERIAL	antibacterial	HUMAN	human	field study	surveillance
Phylogenetic Groups and Antimicrobial Susceptibility Patterns of Escherichia coli from Healthy Chicken in Eastern and Central Uganda	Kabiswa W, Nanteza A, Tumwine G, Majalija S.	30159337	J Vet Med. 2018 Aug 7;2018:9126467. doi: 10.1155/2018/9126467. eCollection 2018.	Kabiswa W	J Vet Med	2018	2018-08-31	PMC6106960		10.1155/2018/9126467			uganda	ANTIBACTERIAL	antibacterial	VETERINARY	veterinary	field study	surveillance
Different origin and dispersal of sulfadoxine-resistant Plasmodium falciparum haplotypes between Eastern Africa and Democratic Republic of Congo	Baraka V, Delgado-Ratto C, Nag S, Ishengoma DS, Madebe RA, Mavoko HM, Nabasumba C, Lutumba P, Alifrangis M, Van Geertruyden JP.	28237831	Int J Antimicrob Agents. 2017 Apr;49(4):456-464. doi: 10.1016/j.ijantimicag.2016.12.007. Epub 2017 Feb 22.	Baraka V	Int J Antimicrob Agents	2017	2017-02-27			10.1016/j.ijantimicag.2016.12.007			multicountry	ANTIMALARIAL	antimalarial	HUMAN	human	field study	resistance genes	characterise (genetic structure) P. falciparum dihydrofolate reductase (Pfdhfr), P. falciparum dihydropteroate synthetase (Pfdhps), six Pfdhps SNP haplotypes detected. Double mutant uganda 87.1%. Triple mutant 12.9% .
Complete ciprofloxacin resistance in gonococcal isolates in an urban Ugandan clinic: findings from a cross-sectional study	Mabonga E, Parkes-Ratanshi R, Riedel S, Nabweyambo S, Mbabazi O, Taylor C, Gaydos C, Manabe YC.	30392463	Int J STD AIDS. 2019 Mar;30(3):256-263. doi: 10.1177/0956462418799017. Epub 2018 Nov 4.	Mabonga E	Int J STD AIDS	2019	2018-11-06	PMC6693629	NIHMS1019011	10.1177/0956462418799017		kampala	uganda	ANTIBACTERIAL	antibacterial	HUMAN	human	field study	surveillance
Detection of copy number variation and single nucleotide polymorphisms in genes involved in drug resistance and other phenotypic traits in P. falciparum clinical isolates collected from Uganda	Kiwuwa MS, Byarugaba J, Wahlgren M, Kironde F.	23220229	Acta Trop. 2013 Mar;125(3):269-75. doi: 10.1016/j.actatropica.2012.11.013. Epub 2012 Dec 7.	Kiwuwa MS	Acta Trop	2013	2012-12-11			10.1016/j.actatropica.2012.11.013		kampala	uganda	ANTIMALARIAL	antimalarial	HUMAN	human	field study	resistance genes	prevalence and characterisation, The presence of the pfmdr- 1 86Y mutation in samples with the pfcrt 76T mutation was more prevalent among mild malaria cases 52 (66.6%) compared to 40 (53.5%) in severe malaria cases
Bacteremia, causative agents and antimicrobial susceptibility among HIV-1-infected children on antiretroviral therapy in Uganda and Zimbabwe	Musiime V, Cook A, Bakeera-Kitaka S, Vhembo T, Lutakome J, Keishanyu R, Prendergast AJ, Lubwama S, Robertson V, Hughes P, Nathoo K, Munderi P, Klein N, Musoke P, Gibb DM; ARROW Trial Team.	23407100	Pediatr Infect Dis J. 2013 Aug;32(8):856-62. doi: 10.1097/INF.0b013e31828c3991.	Musiime V	Pediatr Infect Dis J	2013	2013-02-15			10.1097/INF.0b013e31828c3991			multicountry	ANTIBACTERIAL	antibacterial	HUMAN	human	field study	surveillance
Shifts in geographic distribution and antimicrobial resistance during a prolonged typhoid fever outbreak--Bundibugyo and Kasese Districts, Uganda, 2009-2011	Walters MS, Routh J, Mikoleit M, Kadivane S, Ouma C, Mubiru D, Mbusa B, Murangi A, Ejoku E, Rwantangle A, Kule U, Lule J, Garrett N, Halpin J, Maxwell N, Kagirita A, Mulabya F, Makumbi I, Freeman M, Joyce K, Hill V, Downing R, Mintz E.	24603860	PLoS Negl Trop Dis. 2014 Mar 6;8(3):e2726. doi: 10.1371/journal.pntd.0002726. eCollection 2014 Mar.	Walters MS	PLoS Negl Trop Dis	2014	2014-03-08	PMC3945727		10.1371/journal.pntd.0002726		bundibugyo, kasese	uganda	ANTIBACTERIAL	antibacterial	HUMAN	human	field study	surveillance
Changing Antimalarial Drug Resistance Patterns Identified by Surveillance at Three Sites in Uganda	Tumwebaze P, Tukwasibwe S, Taylor A, Conrad M, Ruhamyankaka E, Asua V, Walakira A, Nankabirwa J, Yeka A, Staedke SG, Greenhouse B, Nsobya SL, Kamya MR, Dorsey G, Rosenthal PJ.	28039354	J Infect Dis. 2017 Feb 15;215(4):631-635. doi: 10.1093/infdis/jiw614.	Tumwebaze P	J Infect Dis	2017	2017-01-01	PMC5853976		10.1093/infdis/jiw614			uganda	ANTIMALARIAL	antimalarial	HUMAN	human	field study	resistance genes	prevalence of Resistance-Mediating Polymorphisms in Putative Transporters, Resistance-Mediating Polymorphisms in Folate Pathway Enzymes, Resistance-Mediating Polymorphisms and Haplotype Analysis, K13 Polymorphisms
Prevalence and molecular characteristics of Staphylococcus aureus, including methicillin resistant strains, isolated from bulk can milk and raw milk products in pastoral communities of South-West Uganda	Asiimwe BB, Baldan R, Trovato A, Cirillo DM.	28610560	BMC Infect Dis. 2017 Jun 13;17(1):422. doi: 10.1186/s12879-017-2524-4.	Asiimwe BB	BMC Infect Dis	2017	2017-06-15	PMC5470224		10.1186/s12879-017-2524-4			uganda	ANTIBACTERIAL	antibacterial	VETERINARY	veterinary	field study	resistance genes	prevalence of spa, SCCmec, PVL enterotoxin genes
Aerobic cervical bacteriology and antibiotic sensitivity patterns in patients with advanced cervical cancer before and after radiotherapy at a national referral hospital in Uganda	Mubangizi L, Namusoke F, Mutyaba T.	24786141	Int J Gynaecol Obstet. 2014 Jul;126(1):37-40. doi: 10.1016/j.ijgo.2014.01.013. Epub 2014 Apr 2.	Mubangizi L	Int J Gynaecol Obstet	2014	2014-05-03			10.1016/j.ijgo.2014.01.013		kampala	uganda	ANTIBACTERIAL	antibacterial	HUMAN	human	field study	surveillance
Cervicovaginal Bacteriology and Antibiotic Sensitivity Patterns among Women with Premature Rupture of Membranes in Mulago Hospital, Kampala, Uganda: A Cross-Sectional Study	Musaba MW, Kagawa MN, Kiggundu C, Kiondo P, Wandabwa J.	28280293	Infect Dis Obstet Gynecol. 2017;2017:9264571. doi: 10.1155/2017/9264571. Epub 2017 Feb 9.	Musaba MW	Infect Dis Obstet Gynecol	2017	2017-03-11	PMC5322418		10.1155/2017/9264571		kampala	uganda	ANTIBACTERIAL	antibacterial	HUMAN	human	field study	surveillance
Antimicrobial Drug Resistance in Blood Culture Isolates at a Tertiary Hospital, Uganda	Kajumbula H, Fujita AW, Mbabazi O, Najjuka C, Izale C, Akampurira A, Aisu S, Lamorde M, Walwema R, Bahr NC, Meya DB, Boulware DR, Manabe YC.	29260682	Emerg Infect Dis. 2018 Jan;24(1):174-175. doi: 10.3201/eid2401.171112.	Kajumbula H	Emerg Infect Dis	2018	2017-12-21	PMC5749445		10.3201/eid2401.171112			uganda	ANTIBACTERIAL	antibacterial	HUMAN	human	field study	surveillance
Antimicrobial susceptibility profiles of Escherichia coli and Klebsiella pneumoniae isolated from outpatients in urban and rural districts of Uganda	Najjuka CF, Kateete DP, Kajumbula HM, Joloba ML, Essack SY.	27113038	BMC Res Notes. 2016 Apr 25;9:235. doi: 10.1186/s13104-016-2049-8.	Najjuka CF	BMC Res Notes	2016	2016-04-27	PMC4843195		10.1186/s13104-016-2049-8		kampala, kayunga, mpigi	uganda	ANTIBACTERIAL	antibacterial	HUMAN	human	field study	surveillance
Genotypic diversity among multidrug resistant Pseudomonas aeruginosa and Acinetobacter species at Mulago Hospital in Kampala, Uganda	Kateete DP, Nakanjako R, Okee M, Joloba ML, Najjuka CF.	28705201	BMC Res Notes. 2017 Jul 14;10(1):284. doi: 10.1186/s13104-017-2612-y.	Kateete DP	BMC Res Notes	2017	2017-07-15	PMC5513047		10.1186/s13104-017-2612-y		kampala	uganda	ANTIBACTERIAL	antibacterial	HUMAN	human	field study	surveillance
Salmonella species in piglets and weaners from Uganda: prevalence, antimicrobial resistance and herd-level risk factors	Ikwap K, Erume J, Owiny DO, Nasinyama GW, Melin L, Bengtsson B, Lundeheim N, FellstrÃ¶m C, Jacobson M.	24694586	Prev Vet Med. 2014 Jul 1;115(1-2):39-47. doi: 10.1016/j.prevetmed.2014.03.009. Epub 2014 Mar 18.	Ikwap K	Prev Vet Med	2014	2014-04-04			10.1016/j.prevetmed.2014.03.009			uganda	ANTIBACTERIAL	antibacterial	VETERINARY	veterinary	field study	surveillance
Phenotypic and Genotypic Characterization of Escherichia coli and Salmonella enterica from Dairy Cattle Farms in the Wakiso District, Uganda: A Cross-Sectional Study	Ball TA, Monte DF, Aidara-Kane A, Matheu-Alvarez J, Ru H, Thakur S, Horovitz J, Ejobi F, Lacher DW, Fedorka-Cray PJ.	30601032	Foodborne Pathog Dis. 2019 Jan;16(1):54-59. doi: 10.1089/fpd.2018.2528. Epub 2019 Jan 2.	Ball TA	Foodborne Pathog Dis	2019	2019-01-03			10.1089/fpd.2018.2528	no free	wakiso	uganda	ANTIBACTERIAL	antibacterial	VETERINARY	veterinary	field study	resistance genes	presence of the plasmid-mediated quinolone resistance qnrS1 gene among three ESBL isolates, Class 1 integrons,
High prevalence of ciprofloxacin-resistant gonorrhea among female sex workers in Kampala, Uganda (2008-2009)	Vandepitte J, Hughes P, Matovu G, Bukenya J, Grosskurth H, Lewis DA.	24622633	Sex Transm Dis. 2014 Apr;41(4):233-7. doi: 10.1097/OLQ.0000000000000099.	Vandepitte J	Sex Transm Dis	2014	2014-03-14			10.1097/OLQ.0000000000000099		kampala	uganda	ANTIBACTERIAL	antibacterial	HUMAN	human	field study	surveillance
Nosocomial bacterial infections and their antimicrobial susceptibility patterns among patients in Ugandan intensive care units: a cross sectional study	Agaba P, Tumukunde J, Tindimwebwa JVB, Kwizera A.	28754148	BMC Res Notes. 2017 Jul 28;10(1):349. doi: 10.1186/s13104-017-2695-5.	Agaba P	BMC Res Notes	2017	2017-07-30	PMC5534037		10.1186/s13104-017-2695-5			uganda	ANTIBACTERIAL	antibacterial	HUMAN	human	field study	surveillance
Multidrug resistance among Escherichia coli and Klebsiella pneumoniae carried in the gut of out-patients from pastoralist communities of Kasese district, Uganda	Stanley IJ, Kajumbula H, Bazira J, Kansiime C, Rwego IB, Asiimwe BB.	30016317	PLoS One. 2018 Jul 17;13(7):e0200093. doi: 10.1371/journal.pone.0200093. eCollection 2018.	Stanley IJ	PLoS One	2018	2018-07-18	PMC6049918		10.1371/journal.pone.0200093		kasese	uganda	ANTIBACTERIAL	antibacterial	HUMAN	human	field study	surveillance
Potential Sources and Transmission of Salmonella and Antimicrobial Resistance in Kampala, Uganda	Afema JA, Byarugaba DK, Shah DH, Atukwase E, Nambi M, Sischo WM.	26999788	PLoS One. 2016 Mar 21;11(3):e0152130. doi: 10.1371/journal.pone.0152130. eCollection 2016.	Afema JA	PLoS One	2016	2016-03-22	PMC4801205		10.1371/journal.pone.0152130		kampala	uganda	ANTIBACTERIAL	antibacterial	ONEHEALTH	onehealth	field study	surveillance
Isolation and Characterization of Antimicrobial-Resistant Escherichia coli from Retail Meats from Roadside Butcheries in Uganda	Okubo T, Yossapol M, Ikushima S, Kakooza S, Wampande EM, Asai T, Tsuchida S, Ohya K, Maruyama F, Kabasa JD, Ushida K.	32551973	Foodborne Pathog Dis. 2020 Jun 17. doi: 10.1089/fpd.2020.2796. Online ahead of print.	Okubo T	Foodborne Pathog Dis	2020	2020-06-20			10.1089/fpd.2020.2796	no free	kampala	uganda	ANTIBACTERIAL	antibacterial	VETERINARY	veterinary	field study	resistance genes	antimicrobial resistance genes prevalence of Phylogenetic type B1 (70.8%) tetA and/or tetB genes (28.1%) blaTEM (15.7%) sul2 (15.7%)
Polymorphisms in K13 and falcipain-2 associated with artemisinin resistance are not prevalent in Plasmodium falciparum isolated from Ugandan children	Conrad MD, Bigira V, Kapisi J, Muhindo M, Kamya MR, Havlir DV, Dorsey G, Rosenthal PJ.	25144768	PLoS One. 2014 Aug 21;9(8):e105690. doi: 10.1371/journal.pone.0105690. eCollection 2014.	Conrad MD	PLoS One	2014	2014-08-22	PMC4140830		10.1371/journal.pone.0105690			uganda	ANTIMALARIAL	antimalarial	HUMAN	human	field study	resistance genes	prevalence of K13-propeller and FP2 polymorphisms (0%) ,
Cotrimoxazole resistance of Streptococcus pneumoniae and commensal streptococci from Kampala, Uganda	WilÃ©n M, Buwembo W, Sendagire H, Kironde F, Swedberg G.	19140088	Scand J Infect Dis. 2009;41(2):113-21. doi: 10.1080/00365540802651889.	WilÃ©n M	Scand J Infect Dis	2009	2009-01-14			10.1080/00365540802651889	no free	kampala	uganda	ANTIBACTERIAL	antibacterial	HUMAN	human	field study	resistance genes	charcaterisation of genes coding for dihydropteroate synthase (DHPS) and dihydrofolate reductase (DHFR), folA and folP genes of
Modeling Prevention of Malaria and Selection of Drug Resistance with Different Dosing Schedules of Dihydroartemisinin-Piperaquine Preventive Therapy during Pregnancy in Uganda	Wallender E, Zhang N, Conrad M, Kakuru A, Muhindo M, Tumwebaze P, Kajubi R, Mota D, Legac J, Jagannathan P, Havlir D, Kamya M, Dorsey G, Aweeka F, Rosenthal PJ, Savic RM.	30530597	Antimicrob Agents Chemother. 2019 Jan 29;63(2):e01393-18. doi: 10.1128/AAC.01393-18. Print 2019 Feb.	Wallender E	Antimicrob Agents Chemother	2019	2018-12-12	PMC6355581		10.1128/AAC.01393-18			uganda	ANTIMALARIAL	antimalarial	HUMAN	human	field study	resistance genes	selection, prevalences pfmdr1 86Y: SP, 27%; DHA-PQ, 65%; pfcrt 76T: SP, 82%; DHA-PQ, 87%
Prevalence of Molecular Markers of Antimalarial Drug Resistance across Altitudinal Transmission Zones in Highland Western Uganda	Boyce RM, Brazeau N, Fulton T, Hathaway N, Matte M, Ntaro M, Mulogo E, Juliano JJ.	31436149	Am J Trop Med Hyg. 2019 Oct;101(4):799-802. doi: 10.4269/ajtmh.19-0081.	Boyce RM	Am J Trop Med Hyg	2019	2019-08-23	PMC6779209		10.4269/ajtmh.19-0081			uganda	ANTIMALARIAL	antimalarial	HUMAN	human	field study	resistance genes	prevalence of Plasmodium falciparum multidrug resistance 1 mutations with the largest proportion of Y184F mutations
The prevalence and antibiotics susceptibility pattern of Neisseria gonorrhoeae in patients attending OPD clinics at St. Mary's Hospital Lacor Uganda	Amito Florence P, Otim F, Okongo F, Ogwang M, Greco D.	23469585	J Prev Med Hyg. 2012 Dec;53(4):186-9.	Amito Florence P	J Prev Med Hyg	2012	2013-03-09					gulu	uganda	ANTIBACTERIAL	antibacterial	HUMAN	human	field study	surveillance
Childhood bacterial meningitis in Mbarara Hospital, Uganda: antimicrobial susceptibility and outcome of treatment	Kiwanuka JP, Mwanga J.	12789126	Afr Health Sci. 2001 Aug;1(1):9-11.	Kiwanuka JP	Afr Health Sci	2001	2003-06-06	PMC2704445				mbarara	uganda	ANTIBACTERIAL	antibacterial	HUMAN	human	field study	surveillance
Large differences in prevalence of Pfcrt and Pfmdr1 mutations between Mwanza, Tanzania and Iganga, Uganda-a reflection of differences in policies regarding withdrawal of chloroquine?	Kamugisha E, Bujila I, Lahdo M, Pello-Esso S, Minde M, Kongola G, Naiwumbwe H, Kiwuwa S, Kaddumukasa M, Kironde F, Swedberg G.	22118982	Acta Trop. 2012 Feb;121(2):148-51. doi: 10.1016/j.actatropica.2011.11.004. Epub 2011 Nov 16.	Kamugisha E	Acta Trop	2012	2011-11-29			10.1016/j.actatropica.2011.11.004		iganga	multicountry	ANTIMALARIAL	antimalarial	HUMAN	human	field study	resistance genes	The prevalence of K76T mutations at Pfcrt was 100% in iganga, uganda, N86Y mutations in Pfmdr1 was 77.7%.
Highly Diverse Hepatitis C Strains Detected in Sub-Saharan Africa Have Unknown Susceptibility to Direct-Acting Antiviral Treatments	Davis C, Mgomella GS, da Silva Filipe A, Frost EH, Giroux G, Hughes J, Hogan C, Kaleebu P, Asiki G, McLauchlan J, Niebel M, Ocama P, Pomila C, Pybus OG, PÃ©pin J, Simmonds P, Singer JB, Sreenu VB, Wekesa C, Young EH, Murphy DG, Sandhu M, Thomson EC.	30387174	Hepatology. 2019 Apr;69(4):1426-1441. doi: 10.1002/hep.30342. Epub 2019 Mar 22.	Davis C	Hepatology	2019	2018-11-03	PMC6492010		10.1002/hep.30342			multicountry	ANTIVIRAL	antiviral	HUMAN	human	field study	resistance genes	characterise. HCV strains detected in Uganda included genotype (g) 4k, g4p, g4q, and g4s and a newly identified unassigned g7 HCV strain. These g4 and g7 strains contain nonstructural (ns) protein 3 and 5A polymorphisms associated with re- sistance to DAAs in other genotypes
Phylogenetic polymorphisms in antibiotic resistance genes of the Mycobacterium tuberculosis complex	Feuerriegel S, KÃ¶ser CU, Niemann S.	24458512	J Antimicrob Chemother. 2014 May;69(5):1205-10. doi: 10.1093/jac/dkt535. Epub 2014 Jan 23.	Feuerriegel S	J Antimicrob Chemother	2014	2014-01-25			10.1093/jac/dkt535			multicountry	ANTIBACTERIAL	antibacterial	HUMAN	human	laboratory study	resistance genes	characterisation. Mutation gyrA Genotype uganda I and II has Thr80Ala (acc/gcc)
Epidemiology of HBV infection in a cohort of Ugandan HIV-infected patients and rate and pattern of lamivudine-resistant HBV infection in patients receiving antiretroviral therapy	Calisti G, Muhindo R, Boum Y 2nd, Wilson LA, Foster GM, Geretti AM, Bhagani S.	26386408	Trans R Soc Trop Med Hyg. 2015 Nov;109(11):723-9. doi: 10.1093/trstmh/trv077. Epub 2015 Sep 18.	Calisti G	Trans R Soc Trop Med Hyg	2015	2015-09-20			10.1093/trstmh/trv077		mbarara	uganda	ANTIVIRAL	antiviral	HUMAN	human	field study	resistance genes	prevalence. 17 had lamivudine-resistant HBV strains harbouring rtM204V/I mutations accompanied by secondary/compensatory mutations.
Impact of Intermittent Preventive Treatment During Pregnancy on Plasmodium falciparum Drug Resistance-Mediating Polymorphisms in Uganda	Conrad MD, Mota D, Foster M, Tukwasibwe S, Legac J, Tumwebaze P, Whalen M, Kakuru A, Nayebare P, Wallender E, Havlir DV, Jagannathan P, Huang L, Aweeka F, Kamya MR, Dorsey G, Rosenthal PJ.	28968782	J Infect Dis. 2017 Nov 15;216(8):1008-1017. doi: 10.1093/infdis/jix421.	Conrad MD	J Infect Dis	2017	2017-10-03	PMC5853776		10.1093/infdis/jix421			uganda	ANTIMALARIAL	antimalarial	HUMAN	human	field study	resistance genes	prevalences of mutations at pfmdr1 N86Y, pfmdr1 Y184F, and pfcrt K76T compared to SP (64.6% vs 27.4%, P < .001; 93.9% vs 59.2%, P < .001; and 87.7% vs 75.4%, P = .03, respectively)
Cotrimoxazole Prophylaxis Specifically Selects for Cotrimoxazole Resistance in Streptococcus mutans and Streptococcus sobrinus with Varied Polymorphisms in the Target Genes folA and folP	William B, Rwenyonyi CM, Swedberg G, Kironde F.	22315614	Int J Microbiol. 2012;2012:916129. doi: 10.1155/2012/916129. Epub 2012 Jan 24.	William B	Int J Microbiol	2012	2012-02-09	PMC3270425		10.1155/2012/916129		kampala	uganda	ANTIBACTERIAL	antibacterial	HUMAN	human	field study	surveillance	charcaterisation. Sequence analysis ofthe folP gene for 797 revealed four point mutations in positions at A46 V, E 80 K, Q122 H, and S146G when compared to the database sequence of strain NN 2025. However, in compar- ison with the other published sequence from UA 159, only position S146G differed in 797
Methicillin-Resistant Staphylococcus aureus Nasal Colonization among Healthcare Workers at Kampala International University Teaching Hospital, Southwestern Uganda	Abimana JB, Kato CD, Bazira J.	30984319	Can J Infect Dis Med Microbiol. 2019 Mar 10;2019:4157869. doi: 10.1155/2019/4157869. eCollection 2019.	Abimana JB	Can J Infect Dis Med Microbiol	2019	2019-04-16	PMC6431477		10.1155/2019/4157869		ishaka	uganda	ANTIBACTERIAL	antibacterial	HUMAN	human	field study	resistance genes	8 (28.6%) were genotypically MRSA (had mecA gene). Only 6 isolates of the 13 isolates (46%) which showed resistance to cefoxitin had mecA gene detectable while 2 (13.3%) of the 15 cefoxitin susceptible isolates were found to carry mecA gene.
Impact of antimalarial treatment and chemoprevention on the drug sensitivity of malaria parasites isolated from ugandan children	Tumwebaze P, Conrad MD, Walakira A, LeClair N, Byaruhanga O, Nakazibwe C, Kozak B, Bloome J, Okiring J, Kakuru A, Bigira V, Kapisi J, Legac J, Gut J, Cooper RA, Kamya MR, Havlir DV, Dorsey G, Greenhouse B, Nsobya SL, Rosenthal PJ.	25753626	Antimicrob Agents Chemother. 2015;59(6):3018-30. doi: 10.1128/AAC.05141-14. Epub 2015 Mar 9.	Tumwebaze P	Antimicrob Agents Chemother	2015	2015-03-11	PMC4432194		10.1128/AAC.05141-14		tororo	uganda	ANTIMALARIAL	antimalarial	HUMAN	human	field study	resistance genes	prevalences of pfcrt K76 and pfmdr1 N86 and D1246 increased, and the prevalences ofpfdhfr and pfdhps polymorphisms associated with antifolate resistance were unchanged
Relative prevalence of methicilline resistant Staphylococcus aureus and its susceptibility pattern in Mulago Hospital, Kampala, Uganda	Ojulong J, Mwambu TP, Joloba M, Bwanga F, Kaddu-Mulindwa DH.	20734712	Tanzan J Health Res. 2009 Jul;11(3):149-53. doi: 10.4314/thrb.v11i3.47703.	Ojulong J	Tanzan J Health Res	2009	2010-08-26			10.4314/thrb.v11i3.47703		kampala	uganda	ANTIBACTERIAL	antibacterial	HUMAN	human	field study	surveillance
Antimicrobial-resistant infections among postpartum women at a Ugandan referral hospital	Bebell LM, Ngonzi J, Bazira J, Fajardo Y, Boatin AA, Siedner MJ, Bassett IV, Nyehangane D, Nanjebe D, Jacquemyn Y, van Geertruyden JP, Mwanga-Amumpaire J, Bangsberg DR, Riley LE, Boum Y 2nd.	28406949	PLoS One. 2017 Apr 13;12(4):e0175456. doi: 10.1371/journal.pone.0175456. eCollection 2017.	Bebell LM	PLoS One	2017	2017-04-14	PMC5391058		10.1371/journal.pone.0175456		mbarara	uganda	ANTIBACTERIAL	antibacterial	HUMAN	human	field study	surveillance
Short communication: high rates of thymidine analogue mutations and dual-class resistance among HIV-infected Ugandan children failing first-line antiretroviral therapy	Sigaloff KC, Kayiwa J, Musiime V, Calis JC, Kaudha E, Mukuye A, Matama C, Nankya I, Nakatudde L, Dekker JT, Hamers RL, Mugyenyi P, Rinke De Wit TF, Kityo C.	23517497	AIDS Res Hum Retroviruses. 2013 Jun;29(6):925-30. doi: 10.1089/AID.2012.0218. Epub 2013 Apr 17.	Sigaloff KC	AIDS Res Hum Retroviruses	2013	2013-03-23			10.1089/AID.2012.0218			uganda	ANTIVIRAL	antiviral	HUMAN	human	field study	resistance genes	Forty-six percent (95% CI 30–61%) of children harbored 2 or more thymidine analog mutations. M184V was identified as the only NRTI mutation in 27% (95% CI 15–43%)
Absence of in vivo selection for K13 mutations after artemether-lumefantrine treatment in Uganda	Balikagala B, Mita T, Ikeda M, Sakurai M, Yatsushiro S, Takahashi N, Tachibana SI, Auma M, Ntege EH, Ito D, Takashima E, Palacpac NM, Egwang TG, Onen JO, Kataoka M, Kimura E, Horii T, Tsuboi T.	28068997	Malar J. 2017 Jan 9;16(1):23. doi: 10.1186/s12936-016-1663-1.	Balikagala B	Malar J	2017	2017-01-11	PMC5223472		10.1186/s12936-016-1663-1		gulu	uganda	ANTIMALARIAL	antimalarial	HUMAN	human	field study	resistance genes	Among 146 isolates obtained before treatment, wild‑type alleles were observed in 98.6% of isolates in pfkelch13 and in all isolates in the six putative background genes except I356T in pfcrt, which had 2.4% of isolates as mixed infections. In vivo selection study revealed that all isolates detected in the follow‑up period harboured wild type alleles in pfkelch13 and the six background genes
High prevalence of antibiotic resistance in nasopharyngeal bacterial isolates from healthy children in rural Uganda: A cross-sectional study	Rutebemberwa E, Mpeka B, Pariyo G, Peterson S, Mworozi E, Bwanga F, KÃ¤llander K.	26305429	Ups J Med Sci. 2015;120(4):249-56. doi: 10.3109/03009734.2015.1072606. Epub 2015 Aug 25.	Rutebemberwa E	Ups J Med Sci	2015	2015-08-26	PMC4816885		10.3109/03009734.2015.1072606		iganga, mayuge	uganda	ANTIBACTERIAL	antibacterial	HUMAN	human	field study	surveillance
Molecular epidemiology, drug susceptibility and economic aspects of tuberculosis in Mubende district, Uganda	Muwonge A, Malama S, Johansen TB, Kankya C, Biffa D, Ssengooba W, Godfroid J, DjÃ¸nne B, Skjerve E.	23741382	PLoS One. 2013 May 31;8(5):e64745. doi: 10.1371/journal.pone.0064745. Print 2013.	Muwonge A	PLoS One	2013	2013-06-07	PMC3669366		10.1371/journal.pone.0064745		mubende	uganda	ANTIBACTERIAL	antibacterial	HUMAN	human	field study	resistance genes	chacterisation. 23 different spoligopatterns were detected, nine of which were novel patterns. T2 with the sub types Uganda-I and Uganda-II was the most predominant lineage detected
Prevalence of Escherichia Coli and Its Antimicrobial Susceptibility Profiles among Patients with UTI at Mulago Hospital, Kampala, Uganda	Odongo I, Ssemambo R, Kungu JM.	32076437	Interdiscip Perspect Infect Dis. 2020 Feb 1;2020:8042540. doi: 10.1155/2020/8042540. eCollection 2020.	Odongo I	Interdiscip Perspect Infect Dis	2020	2020-02-21	PMC7016451		10.1155/2020/8042540		kampala	uganda	ANTIBACTERIAL	antibacterial	HUMAN	human	field study	surveillance
Lack of effect of intermittent preventive treatment for malaria in pregnancy and intense drug resistance in western Uganda	Braun V, Rempis E, Schnack A, Decker S, Rubaihayo J, Tumwesigye NM, Theuring S, Harms G, Busingye P, Mockenhaupt FP.	26410081	Malar J. 2015 Sep 26;14:372. doi: 10.1186/s12936-015-0909-7.	Braun V	Malar J	2015	2015-09-28	PMC4583758		10.1186/s12936-015-0909-7		fortportal	uganda	ANTIMALARIAL	antimalarial	HUMAN	human	field study	resistance genes	P. falciparum with intense SP resistance (pfdhfr/pfdhps quintuple or sextuple mutations) were observed in 93 % (pfdhps 581G, 36 %), and the additional high resistance allele pfhdr 164L in 36 %
Artemether-Lumefantrine and Dihydroartemisinin-Piperaquine Exert Inverse Selective Pressure on Plasmodium Falciparum Drug Sensitivity-Associated Haplotypes in Uganda	Taylor AR, Flegg JA, Holmes CC, GuÃ©rin PJ, Sibley CH, Conrad MD, Dorsey G, Rosenthal PJ.	28480232	Open Forum Infect Dis. 2016 Oct 25;4(1):ofw229. doi: 10.1093/ofid/ofw229. eCollection 2017 Winter.	Taylor AR	Open Forum Infect Dis	2016	2017-05-09	PMC5413987		10.1093/ofid/ofw229		tororo	uganda	ANTIMALARIAL	antimalarial	HUMAN	human	field study	resistance genes	characterisation. Haplotypes YYD, YYY, NYD, and NFD had relatively high baseline frequency estimates, whereas estimates for YFD, YFY, NYY, and NFY were comparatively low, especially the latter 2
Antimicrobial resistance in hospitalized surgical patients: a silently emerging public health concern in Uganda	Seni J, Najjuka CF, Kateete DP, Makobore P, Joloba ML, Kajumbula H, Kapesa A, Bwanga F.	23890206	BMC Res Notes. 2013 Jul 27;6:298. doi: 10.1186/1756-0500-6-298.	Seni J	BMC Res Notes	2013	2013-07-30	PMC3729663		10.1186/1756-0500-6-298		kampala	uganda	ANTIBACTERIAL	antibacterial	HUMAN	human	field study	surveillance
In vitro sensitivities of Plasmodium falciparum to different antimalarial drugs in Uganda	Nsobya SL, Kiggundu M, Nanyunja S, Joloba M, Greenhouse B, Rosenthal PJ.	20065051	Antimicrob Agents Chemother. 2010 Mar;54(3):1200-6. doi: 10.1128/AAC.01412-09. Epub 2010 Jan 11.	Nsobya SL	Antimicrob Agents Chemother	2010	2010-01-13	PMC2825959		10.1128/AAC.01412-09		kampala	uganda	ANTIMALARIAL	antimalarial	HUMAN	human	field study	resistance genes	characterisation. For pfcrt, all samples contained the pfcrt 76T mutation, Polymorphisms in pfmdr1 may impact sensitivity to multiple drugs, with, most notably, the 86Y mutation associated
Characteristics of pyogenic odontogenic infection in patients attending Mulago Hospital, Uganda: a cross-sectional study	Kityamuwesi R, Muwaz L, Kasangaki A, Kajumbula H, Rwenyonyi CM.	25881243	BMC Microbiol. 2015 Feb 25;15:46. doi: 10.1186/s12866-015-0382-z.	Kityamuwesi R	BMC Microbiol	2015	2015-04-17	PMC4344792		10.1186/s12866-015-0382-z		kampala	uganda	ANTIBACTERIAL	antibacterial	HUMAN	human	field study	surveillance
Increased Antifungal Drug Resistance in Clinical Isolates of Cryptococcus neoformans in Uganda	Smith KD, Achan B, Hullsiek KH, McDonald TR, Okagaki LH, Alhadab AA, Akampurira A, Rhein JR, Meya DB, Boulware DR, Nielsen K; ASTRO-CM/COAT Team.	26324276	Antimicrob Agents Chemother. 2015 Dec;59(12):7197-204. doi: 10.1128/AAC.01299-15. Epub 2015 Aug 31.	Smith KD	Antimicrob Agents Chemother	2015	2015-09-02	PMC4649209		10.1128/AAC.01299-15		kampala	uganda	ANTIFUNGAL	antifungal	HUMAN	human	field study	surveillance
Temporal changes in prevalence of molecular markers mediating antimalarial drug resistance in a high malaria transmission setting in Uganda	Mbogo GW, Nankoberanyi S, Tukwasibwe S, Baliraine FN, Nsobya SL, Conrad MD, Arinaitwe E, Kamya M, Tappero J, Staedke SG, Dorsey G, Greenhouse B, Rosenthal PJ.	24799371	Am J Trop Med Hyg. 2014 Jul;91(1):54-61. doi: 10.4269/ajtmh.13-0647. Epub 2014 May 5.	Mbogo GW	Am J Trop Med Hyg	2014	2014-05-07	PMC4080569		10.4269/ajtmh.13-0647		tororo	uganda	ANTIMALARIAL	antimalarial	HUMAN	human	field study	resistance genes	Considering transporter mutations, prevalence of the mutant pfcrt 76T, pfmdr1 86Y, and pfmdr1 1246Y alleles decreased over time. Considering antifolate mutations, the prevalence of pfdhfr 51I, 59R, and 108N, and pfdhps 437G and 540E were consistently high; pfdhfr 164L and pfdhps 581G were uncommon, but most prevalent during 2008–2010
Bacterial aetiology and outcome in children with severe pneumonia in Uganda	Nantanda R, Hildenwall H, Peterson S, Kaddu-Mulindwa D, Kalyesubula I, Tumwine JK.	19021940	Ann Trop Paediatr. 2008 Dec;28(4):253-60. doi: 10.1179/146532808X375404.	Nantanda R	Ann Trop Paediatr	2008	2008-11-22			10.1179/146532808X375404		kampala	uganda	ANTIBACTERIAL	antibacterial	HUMAN	human	field study	surveillance
Prevalence, antimicrobial susceptibility and risk factors associated with non-typhoidal Salmonella on Ugandan layer hen farms	Odoch T, Wasteson Y, L'AbÃ©e-Lund T, Muwonge A, Kankya C, Nyakarahuka L, Tegule S, Skjerve E.	29187195	BMC Vet Res. 2017 Nov 29;13(1):365. doi: 10.1186/s12917-017-1291-1.	Odoch T	BMC Vet Res	2017	2017-12-01	PMC5707898		10.1186/s12917-017-1291-1		wakiso	uganda	ANTIBACTERIAL	antibacterial	VETERINARY	veterinary	field study	surveillance
The Lys-76-Thr mutation in PfCRT and chloroquine resistance in Plasmodium falciparum isolates from Uganda	Kyosiimire-Lugemwa J, Nalunkuma-Kazibwe AJ, Mujuzi G, Mulindwa H, Talisuna A, Egwang TG.	11926004	Trans R Soc Trop Med Hyg. 2002 Jan-Feb;96(1):91-5. doi: 10.1016/s0035-9203(02)90252-x.	Kyosiimire-Lugemwa J	Trans R Soc Trop Med Hyg	2002	2002-04-03			10.1016/s0035-9203(02)90252-x		kampala, tororo, apac	uganda	ANTIMALARIAL	antimalarial	HUMAN	human	field study	resistance genes	prevalence of wild tvne and mutant alleles of the PfCRT codon 76 ih base&e pre-CQ treatment P. fulciparum isolates.
Rifampicin resistance mutations in the 81Â bp RRDR of rpoB gene in Mycobacterium tuberculosis clinical isolates using XpertÂ® MTB/RIF in Kampala, Uganda: a retrospective study	Mboowa G, Namaganda C, Ssengooba W.	25190040	BMC Infect Dis. 2014 Sep 4;14:481. doi: 10.1186/1471-2334-14-481.	Mboowa G	BMC Infect Dis	2014	2014-09-06	PMC4164707		10.1186/1471-2334-14-481		kampala	uganda	ANTIBACTERIAL	antibacterial	HUMAN	human	field study	resistance genes	The most common RRDR rpoB gene mutations in the 81 bp were in codons 531 (58%), 513 (25%), 526 (8%), 511 (8%), and none for codon 522
Hand Colonization with Gram-Negative Organisms of Healthcare Workers Accessing the Cardiac Intensive Care Unit: A Cross-Sectional Study at the Uganda Heart Institute	Ssemogerere L, Sendagire C, Mbabazi C, Namungoma Y, Oketayot AN, Namuyonga J, Mijumbi C, Nkwine R, Othin M, Oketcho M, Magala JP, Lwabi P, Kwizera A, DÃ¼nser MW, Najjuka CF.	31687206	Crit Care Res Pract. 2019 Oct 9;2019:6081954. doi: 10.1155/2019/6081954. eCollection 2019.	Ssemogerere L	Crit Care Res Pract	2019	2019-11-06	PMC6811803		10.1155/2019/6081954		kampala	uganda	ANTIBACTERIAL	antibacterial	HUMAN	human	field study	surveillance
Bacteraemia among severely malnourished children infected and uninfected with the human immunodeficiency virus-1 in Kampala, Uganda	Bachou H, TylleskÃ¤r T, Kaddu-Mulindwa DH, Tumwine JK.	17090299	BMC Infect Dis. 2006 Nov 7;6:160. doi: 10.1186/1471-2334-6-160.	Bachou H	BMC Infect Dis	2006	2006-11-09	PMC1660577		10.1186/1471-2334-6-160		kampala	uganda	ANTIBACTERIAL	antibacterial	HUMAN	human	field study	surveillance
High prevalence of Pfmdr-1 N86 and D1246 genotypes detected among febrile malaria outpatients attending Lira Regional Referral Hospital, Northern Uganda	Achol E, Ochaya S, Malinga GM, Edema H, Echodu R.	31014391	BMC Res Notes. 2019 Apr 23;12(1):235. doi: 10.1186/s13104-019-4269-1.	Achol E	BMC Res Notes	2019	2019-04-25	PMC6480777		10.1186/s13104-019-4269-1		lira	uganda	ANTIMALARIAL	antimalarial	HUMAN	human	field study	resistance genes	Plasmodium falciparum multi-drug resistant gene-1 (Pfmdr-1) N86Y and D1246Y genotypes
External ocular surface bacterial isolates and their antimicrobial susceptibility patterns among pre-operative cataract patients at Mulago National Hospital in Kampala, Uganda	Mshangila B, Paddy M, Kajumbula H, Ateenyi-Agaba C, Kahwa B, Seni J.	24238071	BMC Ophthalmol. 2013 Nov 15;13:71. doi: 10.1186/1471-2415-13-71.	Mshangila B	BMC Ophthalmol	2013	2013-11-19	PMC3830561		10.1186/1471-2415-13-71		kampala	uganda	ANTIBACTERIAL	antibacterial	HUMAN	human	field study	surveillance
Response of Plasmodium falciparum to chloroquine and Fansidar in vivo and chloroquine and amodiaquine in vitro in Uganda	Nevill CG, Ochen K, Munafu CG, Bekobita D, Sezi CL.	7498001	East Afr Med J. 1995 Jun;72(6):349-54.	Nevill CG	East Afr Med J	1995	1995-06-01						uganda	ANTIMALARIAL	antimalarial	HUMAN	human	field study	surveillance
Prevalence of virulence determinants in Staphylococcus epidermidis from ICU patients in Kampala, Uganda	Okee MS, Joloba ML, Okello M, Najjuka FC, Katabazi FA, Bwanga F, Nanteza A, Kateete DP.	22421605	J Infect Dev Ctries. 2012 Mar 12;6(3):242-50. doi: 10.3855/jidc.2007.	Okee MS	J Infect Dev Ctries	2012	2012-03-17			10.3855/jidc.2007		kampala	uganda	ANTIBACTERIAL	antibacterial	HUMAN	human	field study	resistance genes	Genes associated with antimicrobial resistance (aac(6')-Ie-aph(2'')-Ia, aph(3')-IIIa, ant(4')-Ia, blaZ, mecA, vanA/vanB1) were detected
Factors associated with community-acquired urinary tract infections among adults attending assessment centre, Mulago Hospital Uganda	Kabugo D, Kizito S, Ashok DD, Graham KA, Nabimba R, Namunana S, Kabaka MR, Achan B, Najjuka FC.	28479906	Afr Health Sci. 2016 Dec;16(4):1131-1142. doi: 10.4314/ahs.v16i4.31.	Kabugo D	Afr Health Sci	2016	2017-05-09	PMC5398460		10.4314/ahs.v16i4.31		kampala	uganda	ANTIBACTERIAL	antibacterial	HUMAN	human	field study	surveillance
Limited ability of Plasmodium falciparum pfcrt, pfmdr1, and pfnhe1 polymorphisms to predict quinine in vitro sensitivity or clinical effectiveness in Uganda	Baliraine FN, Nsobya SL, Achan J, Tibenderana JK, Talisuna AO, Greenhouse B, Rosenthal PJ.	21078941	Antimicrob Agents Chemother. 2011 Feb;55(2):615-22. doi: 10.1128/AAC.00954-10. Epub 2010 Nov 15.	Baliraine FN	Antimicrob Agents Chemother	2011	2010-11-17	PMC3028814		10.1128/AAC.00954-10		kampala	uganda	ANTIMALARIAL	antimalarial	HUMAN	human	field study	resistance genes	characterisation, Associations between polymorphisms and in vitro quinine sensitivity.
The Diversity of the Plasmodium falciparum K13 Propeller Domain Did Not Increase after Implementation of Artemisinin-Based Combination Therapy in Uganda	Conrad MD, Nsobya SL, Rosenthal PJ.	31358588	Antimicrob Agents Chemother. 2019 Sep 23;63(10):e01234-19. doi: 10.1128/AAC.01234-19. Print 2019 Oct.	Conrad MD	Antimicrob Agents Chemother	2019	2019-07-31	PMC6761569		10.1128/AAC.01234-19			uganda	ANTIMALARIAL	antimalarial	HUMAN	human	field study	resistance genes	prevalence. We detected K13PD NS-SNPs in 16 of 683 (2.3%) clinical isolates collected between 1999 and 2004 and in 26 of 716 (3.6%) isolates collected between 2012 and 2016 (P = 0.16), representing a total of 29 different polymorphisms at 27 codons. Individual NS-SNPs were usually detected only once, and none were found in more than 0.7% of the isolates.
High prevalence of carriage of antibiotic-resistant Streptococcus pneumoniae in children in Kampala Uganda	Joloba ML, Bajaksouzian S, Palavecino E, Whalen C, Jacobs MR.	11337227	Int J Antimicrob Agents. 2001 May;17(5):395-400. doi: 10.1016/s0924-8579(00)00345-9.	Joloba ML	Int J Antimicrob Agents	2001	2001-05-05			10.1016/s0924-8579(00)00345-9		kampala	uganda	ANTIBACTERIAL	antibacterial	HUMAN	human	field study	surveillance
Oropharyngeal colonization by Streptococcus pneumoniae among HIV-infected adults in Uganda: assessing prevalence and antimicrobial susceptibility	Blossom DB, Namayanja-Kaye G, Nankya-Mutyoba J, Mukasa JB, Bakka H, Rwambuya S, Windau A, Bajaksouzian S, Walker CJ, Joloba ML, Kityo C, Mugyenyi P, Whalen CC, Jacobs MR, Salata RA.	16997591	Int J Infect Dis. 2006 Nov;10(6):458-64. doi: 10.1016/j.ijid.2006.05.010. Epub 2006 Sep 25.	Blossom DB	Int J Infect Dis	2006	2006-09-26	PMC4515758	NIHMS192196	10.1016/j.ijid.2006.05.010		kampala	uganda	ANTIBACTERIAL	antibacterial	HUMAN	human	field study	surveillance
Septicaemia in a population-based HIV clinical cohort in rural Uganda, 1996-2007: incidence, aetiology, antimicrobial drug resistance and impact of antiretroviral therapy	Mayanja BN, Todd J, Hughes P, Van der Paal L, Mugisha JO, Atuhumuza E, Tabuga P, Maher D, Grosskurth H.	20406428	Trop Med Int Health. 2010 Jun;15(6):697-705. doi: 10.1111/j.1365-3156.2010.02528.x. Epub 2010 Apr 9.	Mayanja BN	Trop Med Int Health	2010	2010-04-22			10.1111/j.1365-3156.2010.02528.x			uganda	ANTIBACTERIAL	antibacterial	HUMAN	human	field study	surveillance
High prevalence of methicillin resistant Staphylococcus aureus in the surgical units of Mulago hospital in Kampala, Uganda	Kateete DP, Namazzi S, Okee M, Okeng A, Baluku H, Musisi NL, Katabazi FA, Joloba ML, Ssentongo R, Najjuka FC.	21899769	BMC Res Notes. 2011 Sep 7;4:326. doi: 10.1186/1756-0500-4-326.	Kateete DP	BMC Res Notes	2011	2011-09-09	PMC3184088		10.1186/1756-0500-4-326		kampala	uganda	ANTIBACTERIAL	antibacterial	HUMAN	human	field study	resistance genes	One isolate positive for all determinants possessed the bhp homologue which encodes the biofilm associated protein (BAP), a rare finding in human isolates. SCCmec type I was the most common at 54% prevalence (22/41), followed by SCCmec type V (15%, 6/41) and SCCmec type IV (7%, 3/41). SCCmec types II and III were not detected and 10 isolates (24%) were non-typeable.
Principal role of dihydropteroate synthase mutations in mediating resistance to sulfadoxine-pyrimethamine in single-drug and combination therapy of uncomplicated malaria in Uganda	Dorsey G, Dokomajilar C, Kiggundu M, Staedke SG, Kamya MR, Rosenthal PJ.	15642967	Am J Trop Med Hyg. 2004 Dec;71(6):758-63.	Dorsey G	Am J Trop Med Hyg	2004	2005-01-12					kampala	uganda	ANTIMALARIAL	antimalarial	HUMAN	human	field study	resistance genes	prevalence. The dhps Glu-540 mutation was the strongest independent predictor of treatment failure. The dhfr Arg-59 mutation was only predictive of treatment failure in the presence of the dhps Glu-540 mutation.
Clindamycin Resistance among Staphylococcus Aureus Isolated at Mbarara Regional Referral Hospital, in South Western Uganda	Mwambi B, Iramiot J, Bwanga F, Nakaye M, Itabangi H, Bazira J.	26046016	Br Microbiol Res J. 2014 Dec 1;4(12):1335-1344. doi: 10.9734/BMRJ/2014/10572.	Mwambi B	Br Microbiol Res J	2014	2015-06-06	PMC4451190	NIHMS693690	10.9734/BMRJ/2014/10572		mbarara	uganda	ANTIBACTERIAL	antibacterial	HUMAN	human	laboratory study	resistance genes	Genotypicaly, 134/300 (44.7%) isolates possessed at least one of the MLSB resistance genes. 23/300 (7.7%) tested positive for ermB, 98/300 (32.7%) tested positive for the ermC and 43/300 (14.3%) tested positive for the msrA genes with none possessing the ermA gene
Characterization of penicillin intermediate serotypes of Streptococcus pneumoniae carried by human immunodeficiency virus-infected adults and healthy children in Uganda	Blossom DB, Cordeiro SM, Bajaksouzian S, Joloba ML, Kityo C, Whalen CC, Salata RA, Jacobs MR.	17536930	Microb Drug Resist. 2007 Spring;13(1):21-8. doi: 10.1089/mdr.2006.9993.	Blossom DB	Microb Drug Resist	2007	2007-06-01			10.1089/mdr.2006.9993	no free		uganda	ANTIBACTERIAL	antibacterial	HUMAN	human	laboratory study	resistance genes	Penicillin-intermediate pneumococci of serotypes present in the Pneumococcal Molecular Epidemiology Network (serotypes 5, 6A, 6B, 9V, 14, 15A, 19A, 19F, 23F, and 35B) accounted for 78 isolates. Novel serotypes also detected.
Comparison of rapid tests for detection of rifampicin-resistant Mycobacterium tuberculosis in Kampala, Uganda	Ogwang S, Asiimwe BB, Traore H, Mumbowa F, Okwera A, Eisenach KD, Kayes S, Jones-LÃ³pez EC, McNerney R, Worodria W, Ayakaka I, Mugerwa RD, Smith PG, Ellner J, Joloba ML.	19709423	BMC Infect Dis. 2009 Aug 26;9:139. doi: 10.1186/1471-2334-9-139.	Ogwang S	BMC Infect Dis	2009	2009-08-28	PMC2744678		10.1186/1471-2334-9-139		kampala	uganda	ANTIBACTERIAL	antibacterial	HUMAN	human	field study	resistance genes
Enterotoxigenic Escherichia coli strains are highly prevalent in Ugandan piggeries but disease outbreaks are masked by antibiotic prophylaxis	Okello E, Moonens K, Erume J, De Greve H.	25311441	Trop Anim Health Prod. 2015 Jan;47(1):117-22. doi: 10.1007/s11250-014-0694-2. Epub 2014 Oct 14.	Okello E	Trop Anim Health Prod	2015	2014-10-15			10.1007/s11250-014-0694-2			uganda	ANTIBACTERIAL	antibacterial	VETERINARY	veterinary	field study	surveillance
Rapid increase in resistance of Plasmodium falciparum to chloroquine-Fansidar in Uganda and the potential of amodiaquine-Fansidar as a better alternative	Sendagire H, Kaddumukasa M, Ndagire D, Aguttu C, Nassejje M, Pettersson M, Swedberg G, Kironde F.	16018959	Acta Trop. 2005 Sep;95(3):172-82. doi: 10.1016/j.actatropica.2005.06.003.	Sendagire H	Acta Trop	2005	2005-07-16			10.1016/j.actatropica.2005.06.003	no free		uganda	ANTIMALARIAL	antimalarial	HUMAN	human	field study	resistance genes	The number of mutations that are associated with SP resistance increased from 2002 to 2003 at all loci monitored, from 83.8 to 100% at codon 108, 58.7 to 76% at codon 59 in the DHFR gene, and from 58.8 to 86% at codon 437 and 33 to 43% at codon 540 in the DHPS gene.
Geographic differences in antimalarial drug efficacy in Uganda are explained by differences in endemicity and not by known molecular markers of drug resistance	Francis D, Nsobya SL, Talisuna A, Yeka A, Kamya MR, Machekano R, Dokomajilar C, Rosenthal PJ, Dorsey G.	16518760	J Infect Dis. 2006 Apr 1;193(7):978-86. doi: 10.1086/500951. Epub 2006 Mar 1.	Francis D	J Infect Dis	2006	2006-03-07			10.1086/500951			uganda	ANTIMALARIAL	antimalarial	HUMAN	human	field study	resistance genes	prevalence of molecular markers of drug resistance was high at all of the sites: 61%–91% of patients were infected with parasites containing the pfcrt Thr-76 mutation and dhfr/dhps quintuple mutation
Incidence and Etiology of Surgical Site Infections among Emergency Postoperative Patients in Mbarara Regional Referral Hospital, South Western Uganda	Lubega A, Joel B, Justina Lucy N.	28168215	Surg Res Pract. 2017;2017:6365172. doi: 10.1155/2017/6365172. Epub 2017 Jan 12.	Lubega A	Surg Res Pract	2017	2017-02-08	PMC5266862		10.1155/2017/6365172		mbarara	uganda	ANTIBACTERIAL	antibacterial	HUMAN	human	field study	surveillance
Fluoroquinolone resistant bacterial isolates from the urinary tract among patients attending hospitals in Bushenyi District, Uganda	Odoki M, Aliero AA, Tibyangye J, Maniga JN, Eilu E, Ntulume I, Wampande E, Kato CD, Agwu E, Bazira J.	32733630	Pan Afr Med J. 2020 Jun 2;36:60. doi: 10.11604/pamj.2020.36.60.18832. eCollection 2020.	Odoki M	Pan Afr Med J	2020	2020-08-01	PMC7371443		10.11604/pamj.2020.36.60.18832		bushenyi	uganda	ANTIBACTERIAL	antibacterial	HUMAN	human	field study	surveillance
Enteric bacterial pathogens in HIV-infected children with acute diarrhea in Mulago referral and teaching hospital, Kampala, Uganda	Musiime V, Kalyesubula I, Kaddu-Mulindwa D, Byarugaba J.	19357426	J Int Assoc Physicians AIDS Care (Chic). 2009 May-Jun;8(3):185-90. doi: 10.1177/1545109709333082. Epub 2009 Apr 8.	Musiime V	J Int Assoc Physicians AIDS Care (Chic)	2009	2009-04-10			10.1177/1545109709333082		kampala	uganda	ANTIBACTERIAL	antibacterial	HUMAN	human	field study	surveillance
The sensitivities to first-line antibiotic therapy of the common urinary tract bacterial infections detected in urine samples at a hospital in metropolitan Kampala (Uganda)	Kyabaggu D, Ejobi F, Olila D.	21499486	Afr Health Sci. 2007 Dec;7(4):214-22.	Kyabaggu D	Afr Health Sci	2007	2011-04-19	PMC3074367				kampala	uganda	ANTIBACTERIAL	antibacterial	HUMAN	human	field study	surveillance
AmpC-BETA Lactamases among Enterobacteriaceae Isolated at a Tertiary Hospital, South Western Uganda	Nakaye M, Bwanga F, Itabangi H, Stanley IJ, Bashir M, Bazira J.	26078920	Br Biotechnol J. 2014 Sep;4(9):1026-1036. doi: 10.9734/BBJ/2014/10570.	Nakaye M	Br Biotechnol J	2014	2015-06-17	PMC4465074	NIHMS693691	10.9734/BBJ/2014/10570		mbarara	uganda	ANTIBACTERIAL	antibacterial	HUMAN	human	laboratory study	resistance genes	characterisation and prevalence. The genotypes detected in this study, included EBC (n=36), FOX (n=18), ACC (n=11), CIT (n=10), DHA (n=07) and MOX (n=1)
Biofilm formation, antimicrobial susceptibility and virulence genes of Uropathogenic Escherichia coli isolated from clinical isolates in Uganda	Katongole P, Nalubega F, Florence NC, Asiimwe B, Andia I.	32600258	BMC Infect Dis. 2020 Jun 29;20(1):453. doi: 10.1186/s12879-020-05186-1.	Katongole P	BMC Infect Dis	2020	2020-07-01	PMC7325280		10.1186/s12879-020-05186-1		kampala	uganda	ANTIBACTERIAL	antibacterial	HUMAN	human	laboratory study	surveillance	virulence genes not associated with biofilm and AMR
Relationship between age, molecular markers, and response to sulphadoxine-pyrimethamine treatment in Kampala, Uganda	Staedke SG, Sendagire H, Lamola S, Kamya MR, Dorsey G, Rosenthal PJ.	15117308	Trop Med Int Health. 2004 May;9(5):624-9. doi: 10.1111/j.1365-3156.2004.01239.x.	Staedke SG	Trop Med Int Health	2004	2004-05-01			10.1111/j.1365-3156.2004.01239.x		kampala	uganda	ANTIMALARIAL	antimalarial	HUMAN	human	field study	resistance genes	The prevalence of pure mutant dhfr 59-Arg (40%), dhps 437-Gly (24%) and dhps 540-Glu (43%) was lower, with samples frequently showing a mixed pattern (18%, 35%, and 23%, respectively
Gut carriage of antimicrobial resistance genes in women exposed to small-scale poultry farms in rural Uganda: A feasibility study	Weil AA, Debela MD, Muyanja DM, Kakuhikire B, Baguma C, Bangsberg DR, Tsai AC, Lai PS.	32525954	PLoS One. 2020 Jun 11;15(6):e0229699. doi: 10.1371/journal.pone.0229699. eCollection 2020.	Weil AA	PLoS One	2020	2020-06-12	PMC7289395		10.1371/journal.pone.0229699			uganda	ANTIBACTERIAL	antibacterial	ONEHEALTH	onehealth	field study	resistance genes	characterisation, AMR genes detected Stool, Six new AMR genes were detected after one year in the control group, and one ofthese was present in chick- ens (CTX-M-1 group)
Associations between aminoquinoline resistance genotypes and clinical presentations of Plasmodium falciparum infection in Uganda	Cuu G, Asua V, Tukwasibwe S, Nsobya S, Mpimbaza A, Rosenthal PJ.	32660999	Antimicrob Agents Chemother. 2020 Jul 13:AAC.00721-20. doi: 10.1128/AAC.00721-20. Online ahead of print.	Cuu G	Antimicrob Agents Chemother	2020	2020-07-15			10.1128/AAC.00721-20	not free		uganda	ANTIMALARIAL	antimalarial	HUMAN	human	field study	resistance genes	overall prevalence of mutations of 30 interest (considering mixed results as mutant) was 67.0% for PfCRT K76T, 8.5% for PfMDR1 31 N86Y, 71.5% for PfMDR1 Y184F, and 14.7% for PfMDR1 D1246Y
Plasmodium falciparum dihydrofolate reductase and dihyropteroate synthase mutations and the use of trimethoprim-sulfamethoxazole prophylaxis among persons infected with human immunodeficiency virus	Malamba S, Sandison T, Lule J, Reingold A, Walker J, Dorsey G, Mermin J.	20439953	Am J Trop Med Hyg. 2010 May;82(5):766-71. doi: 10.4269/ajtmh.2010.08-0408.	Malamba S	Am J Trop Med Hyg	2010	2010-05-05	PMC2861394		10.4269/ajtmh.2010.08-0408		tororo, busia	uganda	ANTIMALARIAL	antimalarial	HUMAN	human	field study	resistance genes	Prevalences of the dhfr pure triple mutant (74% and 70%; P = 0.71), the dhps pure double mutant (95% and 88%; P = 0.21), and the dhfr/dhps pure quintuple mutant (73% and 64%; P = 0.36),
Asymptomatic bacteriuria among pregnant women attending antenatal care at Mbale Hospital, Eastern Uganda	Nteziyaremye J, Iramiot SJ, Nekaka R, Musaba MW, Wandabwa J, Kisegerwa E, Kiondo P.	32191758	PLoS One. 2020 Mar 19;15(3):e0230523. doi: 10.1371/journal.pone.0230523. eCollection 2020.	Nteziyaremye J	PLoS One	2020	2020-03-20	PMC7082119		10.1371/journal.pone.0230523		mbale	uganda	ANTIBACTERIAL	antibacterial	HUMAN	human	field study	surveillance
Lack of Artemisinin Resistance in Plasmodium falciparum in Uganda Based on Parasitological and Molecular Assays	Cooper RA, Conrad MD, Watson QD, Huezo SJ, Ninsiima H, Tumwebaze P, Nsobya SL, Rosenthal PJ.	26033725	Antimicrob Agents Chemother. 2015 Aug;59(8):5061-4. doi: 10.1128/AAC.00921-15. Epub 2015 Jun 1.	Cooper RA	Antimicrob Agents Chemother	2015	2015-06-03	PMC4505276		10.1128/AAC.00921-15		kampala	uganda	ANTIMALARIAL	antimalarial	HUMAN	human	field study	resistance genes	with an increased prevalence ofwild-type sequences at pfcrt K76, pfmdr1 N86, and pfmdr1 D1246 compared to older studies
Prevalence of K13-propeller gene polymorphisms among Plasmodium falciparum parasites isolated from adult symptomatic patients in northern Uganda	Ocan M, Bwanga F, Okeng A, Katabazi F, Kigozi E, Kyobe S, Ogwal-Okeng J, Obua C.	27543172	BMC Infect Dis. 2016 Aug 19;16(1):428. doi: 10.1186/s12879-016-1777-7.	Ocan M	BMC Infect Dis	2016	2016-08-21	PMC4992308		10.1186/s12879-016-1777-7		lira, gulu	uganda	ANTIMALARIAL	antimalarial	HUMAN	human	field study	resistance genes	explored the prevalence of K13-propeller gene polymorphisms
Resistance patterns of Plasmodium falciparum malaria to chloroquine in Kampala, Uganda	Mulindwa HC, Mayanja-Kizza H, Freers J.	12389954	East Afr Med J. 2002 Mar;79(3):115-9. doi: 10.4314/eamj.v79i3.8887.	Mulindwa HC	East Afr Med J	2002	2002-10-23			10.4314/eamj.v79i3.8887		kampala	uganda	ANTIMALARIAL	antimalarial	HUMAN	human	field study	surveillance
Intermittent Preventive Treatment with Dihydroartemisinin-Piperaquine in Ugandan Schoolchildren Selects for Plasmodium falciparum Transporter Polymorphisms That Modify Drug Sensitivity	Nankabirwa JI, Conrad MD, Legac J, Tukwasibwe S, Tumwebaze P, Wandera B, Brooker SJ, Staedke SG, Kamya MR, Nsobya SL, Dorsey G, Rosenthal PJ.	27401569	Antimicrob Agents Chemother. 2016 Sep 23;60(10):5649-54. doi: 10.1128/AAC.00920-16. Print 2016 Oct.	Nankabirwa JI	Antimicrob Agents Chemother	2016	2016-07-13	PMC5038325		10.1128/AAC.00920-16		tororo	uganda	ANTIMALARIAL	antimalarial	HUMAN	human	field study	resistance genes	the prevalences ofmutant genotypes were signifi- cantly greater in children who had received DP within the past 30 days than in those not treated within 60 days (86Y, 18.0% ver- sus 8.3% [Pⴝ 0.03]; 76T, 96.0% versus 86.1% [Pⴝ 0.05])
Antibiotic susceptibility of Staphylococcus aureus in suppurative lesions in Lacor Hospital, Uganda	Kitara LD, Anywar AD, Acullu D, Odongo-Aginya E, Aloyo J, Fendu M.	22135642	Afr Health Sci. 2011 Aug;11 Suppl 1(Suppl 1):S34-9.	Kitara LD	Afr Health Sci	2011	2011-12-03	PMC3220124				gulu	uganda	ANTIBACTERIAL	antibacterial	HUMAN	human	field study	surveillance
Plasmodium falciparum: higher incidence of molecular resistance markers for sulphadoxine than for pyrimethamine in Kasangati, Uganda	Sendagire H, Kyabayinze D, Swedberg G, Kironde F.	15941416	Trop Med Int Health. 2005 Jun;10(6):537-43. doi: 10.1111/j.1365-3156.2005.01414.x.	Sendagire H	Trop Med Int Health	2005	2005-06-09			10.1111/j.1365-3156.2005.01414.x		wakiso	uganda	ANTIMALARIAL	antimalarial	HUMAN	human	field study	resistance genes	incidence. With the exception of codon S108 in dhfr (dhfr S108N was at 94.9%), frequencies of dihydropteroate synthase (dhps) mutant and mixed alleles combined (A437G 89% and K540E 83.9%) were higher than those of dihydrofolate reductase (dhfr) (N51I 58.4%, C59R 31.3%).
Polymorphisms in the Plasmodium falciparum pfcrt and pfmdr-1 genes and clinical response to chloroquine in Kampala, Uganda	Dorsey G, Kamya MR, Singh A, Rosenthal PJ.	11294677	J Infect Dis. 2001 May 1;183(9):1417-20. doi: 10.1086/319865. Epub 2001 Mar 27.	Dorsey G	J Infect Dis	2001	2001-04-11			10.1086/319865		kampala	uganda	ANTIMALARIAL	antimalarial	HUMAN	human	field study	resistance genes	the pfcrt lysinerthreonine mutation at position 76, which recently correlated fully with chloroquine resistance in vitro, was present in 100%
Effect of trimethoprim-sulphamethoxazole on the risk of malaria in HIV-infected Ugandan children living in an area of widespread antifolate resistance	Gasasira AF, Kamya MR, Ochong EO, Vora N, Achan J, Charlebois E, Ruel T, Kateera F, Meya DN, Havlir D, Rosenthal PJ, Dorsey G.	20573194	Malar J. 2010 Jun 23;9:177. doi: 10.1186/1475-2875-9-177.	Gasasira AF	Malar J	2010	2010-06-25	PMC2903607		10.1186/1475-2875-9-177		kampala	uganda	ANTIMALARIAL	antimalarial	HUMAN	human	field study	resistance genes	The prevalences of dhfr 51I, 108N, and 59R and dhps 437G and 540E mutations were each over 90% among parasites. Prevalence of the dhfr 164L mutation, which is associated with high-level resistance, was significantly higher in parasites from HIV-infected compared to uninfected children (8% vs. 1%, p = 0.001).
Fitness Consequences of Plasmodium falciparum pfmdr1 Polymorphisms Inferred from Ex Vivo Culture of Ugandan Parasites	Ochong E, Tumwebaze PK, Byaruhanga O, Greenhouse B, Rosenthal PJ.	23796921	Antimicrob Agents Chemother. 2013 Sep;57(9):4245-4251. doi: 10.1128/AAC.00161-13. Epub 2013 Jun 24.	Ochong E	Antimicrob Agents Chemother	2013	2013-06-26	PMC3754360		10.1128/AAC.00161-13		tororo	uganda	ANTIMALARIAL	antimalarial	HUMAN	human	field study	resistance genes	prevalences in culture over time. Of71 cultures, parasites in 69 were successfully analyzed at N86Y and parasites in 68 were successfully ana- lyzed at D1246Y over 3 to 36 days ofculture.
Mycobacterium tuberculosis spoligotypes and drug susceptibility pattern of isolates from tuberculosis patients in peri-urban Kampala, Uganda	Asiimwe BB, Ghebremichael S, Kallenius G, Koivula T, Joloba ML.	18662405	BMC Infect Dis. 2008 Jul 28;8:101. doi: 10.1186/1471-2334-8-101.	Asiimwe BB	BMC Infect Dis	2008	2008-07-30	PMC2519071		10.1186/1471-2334-8-101		kampala	uganda	ANTIBACTERIAL	antibacterial	HUMAN	human	field study	surveillance	characterisation, no association between any strain types in the sample with either drug resistance
Selection of parasites with diminished drug susceptibility by amodiaquine-containing antimalarial regimens in Uganda	Nawaz F, Nsobya SL, Kiggundu M, Joloba M, Rosenthal PJ.	19905933	J Infect Dis. 2009 Dec 1;200(11):1650-7. doi: 10.1086/647988.	Nawaz F	J Infect Dis	2009	2009-11-13	PMC2782860	NIHMS144038	10.1086/647988			uganda	ANTIMALARIAL	antimalarial	HUMAN	human	field study	surveillance	treatment arm that did not contain AQ (n=20; mean IC50 28.8 nM; range 6.3–121.8 nM; p=0.0042). The proportion of strains with polymorphisms expected to mediate diminished response to AQ (pfmdr-1 86Y and 1246Y) increased after prior AQ therapy, although differences were not significant. Conclusions—Prior
Microbial aetiology and sensitivity of asymptomatic bacteriuria among ante-natal mothers in Mulago hospital, Uganda	Andabati G, Byamugisha J.	21416036	Afr Health Sci. 2010 Dec;10(4):349-52.	Andabati G	Afr Health Sci	2010	2011-03-19	PMC3052809				kampala	uganda	ANTIBACTERIAL	antibacterial	HUMAN	human	field study	surveillance
Whole genome sequences of multi-drug resistant Escherichia coli isolated in a Pastoralist Community of Western Uganda: Phylogenomic changes, virulence and resistant genes	Iramiot JS, Kajumbula H, Bazira J, de Villiers EP, Asiimwe BB.	32469885	PLoS One. 2020 May 29;15(5):e0231852. doi: 10.1371/journal.pone.0231852. eCollection 2020.	Iramiot JS	PLoS One	2020	2020-05-30	PMC7259651		10.1371/journal.pone.0231852			uganda	ANTIBACTERIAL	antibacterial	ONEHEALTH	onehealth	laboratory study	resistance genes	characterisation, However, 67% of the E. coli isolated from cattle were closely related to those ound in humans. The E. coli isolates were assigned to eight different phylogroups: A, B1, B2, Cladel, D, E, F and G, with a majority being assigned to phylogroup A; while most of the animal isolates were assigned to phylogroup B1
Antimicrobial Resistance of Neisseria Gonorrhoeae in a Newly Implemented Surveillance Program in Uganda: Surveillance Report	Workneh M, Hamill MM, Kakooza F, Mande E, Wagner J, Mbabazi O, Mugasha R, Kajumbula H, Walwema R, Zenilman J, Musinguzi P, Kyambadde P, Lamorde M, Manabe YC.	32519969	JMIR Public Health Surveill. 2020 Jun 10;6(2):e17009. doi: 10.2196/17009.	Workneh M	JMIR Public Health Surveill	2020	2020-06-11	PMC7315362		10.2196/17009		kampala	uganda	ANTIBACTERIAL	antibacterial	HUMAN	human	field study	surveillance
Age, temperature, and parasitaemia predict chloroquine treatment failure and anaemia in children with uncomplicated Plasmodium falciparum malaria	Hamer DH, MacLeod WB, Addo-Yobo E, Duggan CP, Estrella B, Fawzi WW, Konde-Lule JK, Mwanakasale V, Premji ZG, SempÃ©rtegui F, Ssengooba FP, Yeboah-Antwi K, Simon JL.	15259472	Trans R Soc Trop Med Hyg. 2003 Jul-Aug;97(4):422-8. doi: 10.1016/s0035-9203(03)90076-9.	Hamer DH	Trans R Soc Trop Med Hyg	2003	2004-07-21			10.1016/s0035-9203(03)90076-9			multicountry	ANTIMALARIAL	antimalarial	HUMAN	human	field study	surveillance
Bacteriuria among adult non-pregnant women attending Mulago hospital assessment centre in Uganda	Mwaka AD, Mayanja-Kizza H, Kigonya E, Kaddu-Mulindwa D.	21857848	Afr Health Sci. 2011 Jun;11(2):182-9.	Mwaka AD	Afr Health Sci	2011	2011-08-23	PMC3158526				kampala	uganda	ANTIBACTERIAL	antibacterial	HUMAN	human	field study	surveillance
Optimization of a ligase detection reaction-fluorescent microsphere assay for characterization of resistance-mediating polymorphisms in African samples of Plasmodium falciparum	LeClair NP, Conrad MD, Baliraine FN, Nsanzabana C, Nsobya SL, Rosenthal PJ.	23720790	J Clin Microbiol. 2013 Aug;51(8):2564-70. doi: 10.1128/JCM.00904-13. Epub 2013 May 29.	LeClair NP	J Clin Microbiol	2013	2013-05-31	PMC3719660		10.1128/JCM.00904-13		kampala	uganda	ANTIMALARIAL	antimalarial	HUMAN	human	field study	resistance genes	characterisation, Analysis of P. falciparum reference strains, We assessed sequences at 5 single nucleotide polymorphisms (SNPs) in pfmdr1 that are common in different parts of the world, a 5 amino acid haplotype in pfcrt that distinguishes chloroquine-sen- sitive and -resistant parasites with different geographic back- grounds
Prevalence of Plasmodium falciparum resistance markers to sulfadoxine-pyrimethamine among pregnant women receiving intermittent preventive treatment for malaria in Uganda	Mbonye AK, Birungi J, Yanow SK, Shokoples S, Malamba S, Alifrangis M, Magnussen P.	26124154	Antimicrob Agents Chemother. 2015 Sep;59(9):5475-82. doi: 10.1128/AAC.00507-15. Epub 2015 Jun 29.	Mbonye AK	Antimicrob Agents Chemother	2015	2015-07-01	PMC4538518		10.1128/AAC.00507-15		mukono	uganda	ANTIMALARIAL	antimalarial	HUMAN	human	field study	resistance genes	aim ofthis study was to assess the prevalence of mutations in Plasmodium falciparum dihydrofolate reductase (Pfdhfr) and dihydropteroate synthase (Pfdhps) genes
Malariological baseline survey and in vitro antimalarial drug resistance in Gulu district, Northern Uganda	Prugger C, Engl M, Ogwang M, Ploner F, Ploner M, Gluderer D, Wernsdorfer G, Wernsdorfer WH; Malaria Monitoring Study Group.	19066776	Wien Klin Wochenschr. 2008;120(19-20 Suppl 4):63-8. doi: 10.1007/s00508-008-1037-y.	Prugger C	Wien Klin Wochenschr	2008	2008-01-01			10.1007/s00508-008-1037-y		gulu	uganda	ANTIMALARIAL	antimalarial	HUMAN	human	field study	surveillance
Antimicrobial susceptibility of cerebrospinal isolates from patients with meningitis	Liskova A, Benca J, Kalavsky E, Kovac M, Rudinsky B, Ondrusova A, Kiwou M.	18030262	Neuro Endocrinol Lett. 2007 Nov;28 Suppl 3:5-6.	Liskova A	Neuro Endocrinol Lett	2007	2007-11-22					buikwe	uganda	ANTIBACTERIAL	antibacterial	HUMAN	human	field study	surveillance
Detecting adenosine triphosphatase 6 (pfATP6) point mutations that may be associated with Plasmodium falciparum resistance to artemisinin: prevalence at baseline, before policy change in Uganda	Kamugisha E, Sendagire H, Kaddumukasa M, Enweji N, Gheysari F, Swedberg G, Kironde F.	24409646	Tanzan J Health Res. 2011 Jan;13(1):40-7. doi: 10.4314/thrb.v13i1.58580.	Kamugisha E	Tanzan J Health Res	2011	2014-01-14			10.4314/thrb.v13i1.58580	https://www.ajol.info/index.php/thrb/article/view/58580/53529		uganda	ANTIMALARIAL	antimalarial	HUMAN	human	field study	resistance genes	We did not find mutations at codons for the key residues Lys 260, Leu263, Gln266, Ser769 and Asn1039. Nucleotide sequencing of pfATPase6 gene DNA from at least 15 clinical isolates confirmed the above findings
Predictors of chloroquine treatment failure in children and adults with falciparum malaria in Kampala, Uganda	Dorsey G, Kamya MR, Ndeezi G, Babirye JN, Phares CR, Olson JE, Katabira ET, Rosenthal PJ.	11304055	Am J Trop Med Hyg. 2000 Jun;62(6):686-92. doi: 10.4269/ajtmh.2000.62.686.	Dorsey G	Am J Trop Med Hyg	2000	2001-04-17			10.4269/ajtmh.2000.62.686		kampala	uganda	ANTIMALARIAL	antimalarial	HUMAN	human	field study	surveillance
Bacteraemia in severely malnourished children in an HIV-endemic setting	Babirekere-Iriso E, Musoke P, Kekitiinwa A.	17132297	Ann Trop Paediatr. 2006 Dec;26(4):319-28. doi: 10.1179/146532806X152845.	Babirekere-Iriso E	Ann Trop Paediatr	2006	2006-11-30			10.1179/146532806X152845		kampala	uganda	ANTIBACTERIAL	antibacterial	HUMAN	human	field study	surveillance
Correlation of in vivo-resistance to chloroquine and allelic polymorphisms in Plasmodium falciparum isolates from Uganda	FlÃ¼eck TP, Jelinek T, Kilian AH, Adagu IS, Kabagambe G, Sonnenburg F, Warhurst DC.	10747279	Trop Med Int Health. 2000 Mar;5(3):174-8. doi: 10.1046/j.1365-3156.2000.00543.x.	FlÃ¼eck TP	Trop Med Int Health	2000	2000-04-04			10.1046/j.1365-3156.2000.00543.x			uganda	ANTIMALARIAL	antimalarial	HUMAN	human	field study	resistance genes	prevalence and characterisation. The proportion of resistant samples among all tested was consistently higher for mutations (86% – 100%) than wild type (55% – 64%
In vivo sensitivity of Plasmodium falciparum to chloroquine and sulfadoxine-pyrimethamine among schoolchildren in rural Uganda: a comparison between 1995 and 1998	Ndyomugyenyi R, Magnussen P.	10974167	Acta Trop. 2000 Oct 2;76(3):265-70. doi: 10.1016/s0001-706x(00)00113-3.	Ndyomugyenyi R	Acta Trop	2000	2000-09-07			10.1016/s0001-706x(00)00113-3			uganda	ANTIMALARIAL	antimalarial	HUMAN	human	field study	surveillance
Drug sensitivity patterns of bacterial isolates from septic post-operative wounds in a regional referral hospital in Uganda	Anguzu JR, Olila D.	18052868	Afr Health Sci. 2007 Sep;7(3):148-54. doi: 10.5555/afhs.2007.7.3.148.	Anguzu JR	Afr Health Sci	2007	2007-12-07	PMC2269712		10.5555/afhs.2007.7.3.148		jinja	uganda	ANTIBACTERIAL	antibacterial	HUMAN	human	field study	surveillance
Comparative impacts over 5 years of artemisinin-based combination therapies on Plasmodium falciparum polymorphisms that modulate drug sensitivity in Ugandan children	Conrad MD, LeClair N, Arinaitwe E, Wanzira H, Kakuru A, Bigira V, Muhindo M, Kamya MR, Tappero JW, Greenhouse B, Dorsey G, Rosenthal PJ.	24610872	J Infect Dis. 2014 Aug 1;210(3):344-53. doi: 10.1093/infdis/jiu141. Epub 2014 Mar 8.	Conrad MD	J Infect Dis	2014	2014-03-11	PMC4110461		10.1093/infdis/jiu141		tororo	uganda	ANTIMALARIAL	antimalarial	HUMAN	human	field study	resistance genes	Prevalence increased significantly over time for pfmdr1 N86 (AL: odds ratio [OR], 2.08 [95% confidence interval {CI}, 1.83–2.38]; DP: 1.41 [95% CI, 1.25–1.57]), pfmdr1 D1246(AL:1.46[95% CI, 1.29–1.64]; DP: 1.36 [95% CI, 1.23–1.50]), and pfcrt K76 (AL: 3.37 [95% CI, 1.85–6.16]; DP: 5.84 [95% CI, 1.94–17.53], and decreased for pfmdr1 Y184 (AL: 0.78 [95% CI, .70–.86]; DP: 0.84 [95% CI, .76–1.50])
Prevalence and Genotypic Characterization of Extended-Spectrum Beta-Lactamases Produced by Gram Negative Bacilli at a Tertiary Care Hospital in Rural South Western Uganda	Moses A, Bwanga F, Boum Y, Bazira J.	26120573	Br Microbiol Res J. 2014 Dec;4(12):1541-1550. doi: 10.9734/BMRJ/2014/9792.	Moses A	Br Microbiol Res J	2014	2015-06-30	PMC4479293	NIHMS693689	10.9734/BMRJ/2014/9792		mbarara	uganda	ANTIBACTERIAL	antibacterial	HUMAN	human	laboratory study	resistance genes	The ESBL genes were blaCTX-M (146; 70%), blaSHV (72; 34%) and blaTEM (100; 47%). 87of 213 isolates expressed more than one ESBL gene. Of these 36 (7.4%) produced blaCTX-M/blaSHV, 28 (5.8%) blaCTX-M /blaTEM, 4 (0.8%) blaSHV/ blaTEM and 19 (3.9%) blaCTX-M/blaSHV/blaTEM
Molecular characterization of Staphylococcus aureus from patients with surgical site infections at Mulago Hospital in Kampala, Uganda	Seni J, Bwanga F, Najjuka CF, Makobore P, Okee M, Mshana SE, Kidenya BR, Joloba ML, Kateete DP.	23840416	PLoS One. 2013 Jun 20;8(6):e66153. doi: 10.1371/journal.pone.0066153. Print 2013.	Seni J	PLoS One	2013	2013-07-11	PMC3688721		10.1371/journal.pone.0066153		kampala	uganda	ANTIBACTERIAL	antibacterial	HUMAN	human	field study	resistance genes	The predominant SCCmec types were type V (33.3%, 8/24) and type I (16.7%, 4/24). The predominant spa lineages were t645 (17.2%, 11/64) and t4353 (15.6%, 10/64), and these were found to be clonally circulating in all the surgical wards. On the other hand, lineages t064, t355, and t4609 were confined to the obstetrics and gynecology wards. A new spa type (t10277) was identified from MSSA isolate.
Species and drug susceptibility profiles of staphylococci isolated from healthy children in Eastern Uganda	Kateete DP, Asiimwe BB, Mayanja R, Najjuka CF, Rutebemberwa E.	32053668	PLoS One. 2020 Feb 13;15(2):e0229026. doi: 10.1371/journal.pone.0229026. eCollection 2020.	Kateete DP	PLoS One	2020	2020-02-14	PMC7018018		10.1371/journal.pone.0229026		iganga, mayuge	uganda	ANTIBACTERIAL	antibacterial	HUMAN	human	field study	resistance genes	characterisation and prevalence, A total of 513 staphylococci belonging to 13 species were isolated from 485 children, The most frequent AMR genes were mecA, vanA, ant(4’)-Ia, and aac(6’)-Ie- aph(2’’)-Ia,
Comparison of transformation frequencies among selected Streptococcus pneumoniae serotypes	Joloba ML, Kidenya BR, Kateete DP, Katabazi FA, Muwanguzi JK, Asiimwe BB, Alarakol SP, Nakavuma JL, Bajaksouzian S, Windau A, Jacobs MR.	20472405	Int J Antimicrob Agents. 2010 Aug;36(2):124-8. doi: 10.1016/j.ijantimicag.2010.03.024. Epub 2010 May 15.	Joloba ML	Int J Antimicrob Agents	2010	2010-05-18	PMC2902549	NIHMS202300	10.1016/j.ijantimicag.2010.03.024		kampala	uganda	ANTIBACTERIAL	antibacterial	HUMAN	human	laboratory study	resistance genes	All successful transformants were resistant to erythromycin as well as tetracycline, indicating that the entire Tn916-like transposon carrying mefE and tetM genes had been incorporated into the recipient genome. Six of eleven clinical serotypes were transformed, in which serotype 3 had the highest transformation frequency of 2.7×10−5.
Nasopharyngeal carriage rate of Streptococcus pneumoniae in Ugandan children with sickle cell disease	Kateete DP, Kajumbula H, Kaddu-Mulindwa DH, Ssevviri AK.	22243524	BMC Res Notes. 2012 Jan 13;5:28. doi: 10.1186/1756-0500-5-28.	Kateete DP	BMC Res Notes	2012	2012-01-17	PMC3283489		10.1186/1756-0500-5-28		kampala	uganda	ANTIBACTERIAL	antibacterial	HUMAN	human	field study	surveillance
International lineages of Salmonella enterica serovars isolated from chicken farms, Wakiso District, Uganda	Ball T, Monte D, Aidara-Kane A, Matheu J, Ru H, Thakur S, Ejobi F, Fedorka-Cray P.	31990938	PLoS One. 2020 Jan 28;15(1):e0220484. doi: 10.1371/journal.pone.0220484. eCollection 2020.	Ball T	PLoS One	2020	2020-01-29	PMC6986767		10.1371/journal.pone.0220484		wakiso	uganda	ANTIBACTERIAL	antibacterial	VETERINARY	veterinary	field study	surveillance	five replicon plasmids were identified among chicken Sal- monella isolates including IncFIIS 17/51 (33.3%), IncI1α 12/51 (23.5%), IncP 8/51 (15.7%), IncX1 8/51 (15.7%), and IncX2 1/51 (2.0%). In addition, we identified two additional repli- cons through WGS (Whole Genome Sequencing; ColpVC and IncFIB)
Population structure of recrudescent Plasmodium falciparum isolates from western Uganda	Jelinek T, Kilian AH, Westermeier A, PrÃ¶ll S, Kabagambe G, Nothdurft HD, von Sonnenburg F, LÃ¶scher T.	10470338	Trop Med Int Health. 1999 Jul;4(7):476-80. doi: 10.1046/j.1365-3156.1999.00428.x.	Jelinek T	Trop Med Int Health	1999	1999-09-02			10.1046/j.1365-3156.1999.00428.x		kabalore, bundibugyo	uganda	ANTIMALARIAL	antimalarial	HUMAN	human	field study	surveillance	59 (72.8%) of the 81 P. falciparum samples isolated at day 0 showed multiclonal infection with at least two clones pre- sent; up to 7 different bands for any one allelic family were observed per sample. Amplification of the allelic families MAD20 and RO33 led to one single fragment each of 160 bp length. characterisation and prevalence.
Effect of cotrimoxazole prophylaxis taken by human immunodeficiency virus (HIV)-infected persons on the selection of sulfadoxine-pyrimethamine-resistant malaria parasites among HIV-uninfected household members	Malamba SS, Mermin J, Reingold A, Lule JR, Downing R, Ransom R, Kigozi A, Hunt BM, Hubbard A, Rosenthal PJ, Dorsey G.	16968909	Am J Trop Med Hyg. 2006 Sep;75(3):375-80.	Malamba SS	Am J Trop Med Hyg	2006	2006-09-14						uganda	ANTIMALARIAL	antimalarial	HUMAN	human	field study	resistance genes	Plasmodium falciparum isolates were recovered from 163 specimens in the exposed households and 113 specimens in the unexposed households, with similar proportions containing the dhfr triple mutant (37% versus 45%; P= 0.18), the dhps double mutant (64% versus 62%; P ⳱ 0.81), and the dhfr/dhps quintuple mutant (30% versus 32%; P ⳱ 0.74)
Plasmodium falciparum resistance to sulfadoxine/pyrimethamine in Uganda: correlation with polymorphisms in the dihydrofolate reductase and dihydropteroate synthetase genes	Jelinek T, Kilian AH, Kabagambe G, von Sonnenburg F.	10497991	Am J Trop Med Hyg. 1999 Sep;61(3):463-6. doi: 10.4269/ajtmh.1999.61.463.	Jelinek T	Am J Trop Med Hyg	1999	1999-09-25			10.4269/ajtmh.1999.61.463			uganda	ANTIMALARIAL	antimalarial	HUMAN	human	field study	resistance genes	The prevalence of 51-asparagine and 108-serine of DHFR and 436-alanine and 581-glycine of DHPS had de- creased to zero while 59-arginine of DHFR and 437-alanine and 540 glutamic acid of DHPS were reduced to one sample each (Table 1).
Multiplicity of Plasmodium falciparum infection predicts antimalarial treatment outcome in Ugandan children	Kyabayinze DJ, Karamagi C, Kiggundu M, Kamya MR, Wabwire-Mangen F, Kironde F, Talisuna A.	20589125	Afr Health Sci. 2008 Dec;8(4):200-5.	Kyabayinze DJ	Afr Health Sci	2008	2010-07-01	PMC2887011				arua	uganda	ANTIMALARIAL	antimalarial	HUMAN	human	field study	resistance genes	charcterisation, The P. falciparum population in Arua was genetically extensive with 32 different alleles of msp-2.
Community-acquired pneumonia in Ugandan adults: short-term parenteral ampicillin therapy for bacterial pneumonia	Yoshimine H, Oishi K, Mubiru F, Nalwoga H, Takahashi H, Amano H, Ombasi P, Watanabe K, Joloba M, Aisu T, Ahmed K, Shimada M, Mugerwa R, Nagatake T.	11442214	Am J Trop Med Hyg. 2001 Mar-Apr;64(3-4):172-7. doi: 10.4269/ajtmh.2001.64.172.	Yoshimine H	Am J Trop Med Hyg	2001	2001-07-10			10.4269/ajtmh.2001.64.172		kampala	uganda	ANTIBACTERIAL	antibacterial	HUMAN	human	field study	surveillance
Population-based validation of dihydrofolate reductase gene mutations for the prediction of sulfadoxine-pyrimethamine resistance in Uganda	Talisuna AO, Langi P, Mutabingwa TK, Watkins W, Van Marck E, Egwang TG, D'Alessandro U.	15228255	Trans R Soc Trop Med Hyg. 2003 May-Jun;97(3):338-42. doi: 10.1016/s0035-9203(03)90163-5.	Talisuna AO	Trans R Soc Trop Med Hyg	2003	2004-07-02			10.1016/s0035-9203(03)90163-5			uganda	ANTIMALARIAL	antimalarial	HUMAN	human	field study	resistance genes	The prevalence of host infections with mutant genotypes was very high for dhfr Asn-108 (median 100%, range 85.1-100%) and for dhfr Ile-51 (median 100%, range 87.5-100%)
Slow Clearance of Plasmodium falciparum in Severe Pediatric Malaria, Uganda, 2011-2013	Hawkes M, Conroy AL, Opoka RO, Namasopo S, Zhong K, Liles WC, John CC, Kain KC.	26079933	Emerg Infect Dis. 2015 Jul;21(7):1237-9. doi: 10.3201/eid2107.150213.	Hawkes M	Emerg Infect Dis	2015	2015-06-17	PMC4480400		10.3201/eid2107.150213			uganda	ANTIMALARIAL	antimalarial	HUMAN	human	field study	resistance genes	We identified limited diversity within the K13 gene. For 16 loci tested (amino acid positions 439, 441, 458, 465, 467, 476, 493, 522, 539, 543, 557, 558, 580, 617, 619, and 637), the wild-type sequence was found in all 78 parasite amplicons.
Rhomboids of Mycobacteria: characterization using an aarA mutant of Providencia stuartii and gene deletion in Mycobacterium smegmatis	Kateete DP, Katabazi FA, Okeng A, Okee M, Musinguzi C, Asiimwe BB, Kyobe S, Asiimwe J, Boom WH, Joloba ML.	23029216	PLoS One. 2012;7(9):e45741. doi: 10.1371/journal.pone.0045741. Epub 2012 Sep 21.	Kateete DP	PLoS One	2012	2012-10-03	PMC3448690		10.1371/journal.pone.0045741			uganda	ANTIBACTERIAL	antibacterial	HUMAN	human	field study	resistance genes	characterisation. upon gene deletion in M. smegmatis, the DMSMEG_4904 single mutant (which lost the gene encoding MSMEG_4904, orthologous to Rv1337, ‘‘rhomboid protease 2’’) formed the least biofilms and was also more susceptible to ciprofloxacin and novobiocin, antimicrobials that inhibit DNA gyrase. However,
Antibiotic availability and multiresistant coliforms in a rural Ugandan hospital	Murdoch DA, Spillman I, Kabare P.	7861476	J Trop Med Hyg. 1995 Feb;98(1):25-8.	Murdoch DA	J Trop Med Hyg	1995	1995-02-01				not free	rukungiri	uganda	ANTIBACTERIAL	antibacterial	HUMAN	human	field study	surveillance	Characterisation, presence of plasmids in ressistant isolates.
Determination of drug susceptibility and DNA fingerprint patterns of clinical isolates of Mycobacterium tuberculosis from Kampala, Uganda	Joloba ML, Whalen CC, Cave DM, Eisenach KD, Johnson JL, Okwera A, Morrissey A, Bajaksouzian S, Feagin J, Mugerwa R, Ellner J, Jacobs MR.	10774085	East Afr Med J. 2000 Feb;77(2):111-5.	Joloba ML	East Afr Med J	2000	2000-04-25				not free	kampala	uganda	ANTIBACTERIAL	antibacterial	HUMAN	human	field study	surveillance
Resistance in vivo of Plasmodium falciparum to co-trimoxazole in western Uganda	Kilian AH, Jelinek T, Prislin I, Kabagambe G, Byamukama W, Mpigika G, Korte R, von Sonnenburg F.	9764333	Trans R Soc Trop Med Hyg. 1998 Mar-Apr;92(2):197-200. doi: 10.1016/s0035-9203(98)90748-9.	Kilian AH	Trans R Soc Trop Med Hyg	1998	1998-10-09			10.1016/s0035-9203(98)90748-9		bundibugyo, kabarole	uganda	ANTIMALARIAL	antimalarial	HUMAN	human	field study	surveillance
Assessment of drug resistance to the malaria parasite in residents of Kampala, Uganda	Mutanda LN.	10520345	East Afr Med J. 1999 Aug;76(8):421-4.	Mutanda LN	East Afr Med J	1999	1999-10-16					kampala	uganda	ANTIMALARIAL	antimalarial	HUMAN	human	field study	surveillance
In vivo sensitivity of Plasmodium falciparum to chloroquine and sulfadoxine-pyrimethamine in school children in Hoima district, western Uganda	Ndyomugyenyi R, Magnussen P.	9210964	Acta Trop. 1997 Sep 10;66(3):137-43. doi: 10.1016/s0001-706x(97)00040-5.	Ndyomugyenyi R	Acta Trop	1997	1997-09-10			10.1016/s0001-706x(97)00040-5		hoima	uganda	ANTIMALARIAL	antimalarial	HUMAN	human	field study	surveillance
Validation of a simplified method for using molecular markers to predict sulfadoxine-pyrimethamine treatment failure in African children with falciparum malaria	Kyabayinze D, Cattamanchi A, Kamya MR, Rosenthal PJ, Dorsey G.	14628939	Am J Trop Med Hyg. 2003 Sep;69(3):247-52.	Kyabayinze D	Am J Trop Med Hyg	2003	2003-11-25					kampala	uganda	ANTIMALARIAL	antimalarial	HUMAN	human	field study	resistance genes	Prevalence of DHFR and DHPS mutations alone and in combination. the prevalence of the DHFR Asn-108 (98%) and Ile-51 (95%) mutations
Malaria transmission intensity and the rate of spread of chloroquine resistant Plasmodium falciparum: Why have theoretical models generated conflicting results?	Talisuna AO, Erhart A, Samarasinghe S, Van Overmeir C, Speybroeck N, D'Alessandro U.	16112915	Infect Genet Evol. 2006 May;6(3):241-8. doi: 10.1016/j.meegid.2005.06.003. Epub 2005 Aug 22.	Talisuna AO	Infect Genet Evol	2006	2005-08-23			10.1016/j.meegid.2005.06.003			uganda	ANTIMALARIAL	antimalarial	HUMAN	human	field study	resistance genes	The prevalence of the mutant (T76) pfcrt allele was always higher than that of the mutant (Y86) pfmdr1 allele, the wild (N86) pfmdr1 allele was also higher compared to the wild (K76) pfcrt allele
The comparative efficacy of chloroquine and sulfadoxine-pyrimethamine for the treatment of uncomplicated falciparum malaria in Kampala, Uganda	Kamya MR, Dorsey G, Gasasira A, Ndeezi G, Babirye JN, Staedke SG, Rosenthal PJ.	11280066	Trans R Soc Trop Med Hyg. 2001 Jan-Feb;95(1):50-5. doi: 10.1016/s0035-9203(01)90331-1.	Kamya MR	Trans R Soc Trop Med Hyg	2001	2001-03-31			10.1016/s0035-9203(01)90331-1		kampala	uganda	ANTIMALARIAL	antimalarial	HUMAN	human	field study	surveillance
Role of the pfcrt codon 76 mutation as a molecular marker for population-based surveillance of chloroquine (CQ)-resistant Plasmodium falciparum malaria in Ugandan sentinel sites with high CQ resistance	Talisuna AO, Kyosiimire-Lugemwa J, Langi P, Mutabingwa TK, Watkins W, Van Marck E, Egwang T, D'Alessandro U.	12474488	Trans R Soc Trop Med Hyg. 2002 Sep-Oct;96(5):551-6. doi: 10.1016/s0035-9203(02)90439-6.	Talisuna AO	Trans R Soc Trop Med Hyg	2002	2002-12-12			10.1016/s0035-9203(02)90439-6			uganda	ANTIMALARIAL	antimalarial	HUMAN	human	field study	resistance genes	T76 frequency was extremely high (median 93*6%, range 86.3-100%); 120 infections (41%) had T76 alone, 16 (54%) K76 alone and 159 (54%) carried both genotypes.
Two mutations in dihydrofolate reductase combined with one in the dihydropteroate synthase gene predict sulphadoxine-pyrimethamine parasitological failure in Ugandan children with uncomplicated falciparum malaria	Talisuna AO, Nalunkuma-Kazibwe A, Langi P, Mutabingwa TK, Watkins WW, Van Marck E, Egwang TG, D'Alessandro U.	15374529	Infect Genet Evol. 2004 Dec;4(4):321-7. doi: 10.1016/j.meegid.2004.04.002.	Talisuna AO	Infect Genet Evol	2004	2004-09-18			10.1016/j.meegid.2004.04.002			uganda	ANTIMALARIAL	antimalarial	HUMAN	human	field study	resistance genes	The dhfr-108 single point mutation (mixed or pure) was observed in all the pre-treatment isolates of the 79 evalu- able patients, the dhfr-59 mutation in 97% (77/79) and the dhps-540 in 91% (72/79) of the isolates
Prolonged selection of pfmdr1 polymorphisms after treatment of falciparum malaria with artemether-lumefantrine in Uganda	Baliraine FN, Rosenthal PJ.	21881128	J Infect Dis. 2011 Oct 1;204(7):1120-4. doi: 10.1093/infdis/jir486.	Baliraine FN	J Infect Dis	2011	2011-09-02	PMC3164433		10.1093/infdis/jir486			uganda	ANTIMALARIAL	antimalarial	HUMAN	human	field study	resistance genes	The pfmdr1 86N, 184F, and 1246D alleles were selected after treatment with artemether-lumefantrine, but not after artesunate-amodiaquine or amodiaquine-sulfadoxine-pyrimethamine
Plasmodium falciparum: selection of serine 108 of dihydrofolate reductase during treatment of uncomplicated malaria with co-trimoxazole in Ugandan children	Jelinek T, Kilian AH, Curtis J, Duraisingh MT, Kabagambe G, von Sonnenburg F, Warhurst DC.	10432069	Am J Trop Med Hyg. 1999 Jul;61(1):125-30. doi: 10.4269/ajtmh.1999.61.125.	Jelinek T	Am J Trop Med Hyg	1999	1999-08-04			10.4269/ajtmh.1999.61.125			uganda	ANTIMALARIAL	antimalarial	HUMAN	human	field study	resistance genes	The prevalence of the alternative alleles at these loci, i.e., 51-isoleucine, 59-arginine, and 108- serine of DHFR and 581-alanine of DHPS consequently be- came 100%
Antibiotic sensitivity of endemic Shigella in Mbarara, Uganda	Legros D, Ochola D, Lwanga N, Guma G.	9640814	East Afr Med J. 1998 Mar;75(3):160-1.	Legros D	East Afr Med J	1998	1998-06-26					mbarara	uganda	ANTIBACTERIAL	antibacterial	HUMAN	human	field study	surveillance
Resistance-mediating Plasmodium falciparum pfcrt and pfmdr1 alleles after treatment with artesunate-amodiaquine in Uganda	Nsobya SL, Dokomajilar C, Joloba M, Dorsey G, Rosenthal PJ.	17562798	Antimicrob Agents Chemother. 2007 Aug;51(8):3023-5. doi: 10.1128/AAC.00012-07. Epub 2007 Jun 11.	Nsobya SL	Antimicrob Agents Chemother	2007	2007-06-15	PMC1932488		10.1128/AAC.00012-07		tororo	uganda	ANTIMALARIAL	antimalarial	HUMAN	human	field study	resistance genes	Genotyping was successful for all isolates. For pfmdr1, the prevalence of mutant alleles (including mixed and pure mutant isolates) increased significantly from pretreatment to new-in- fection isolates for 86Y (182/201, 90.5%, to 128/132, 97.0%; P ⫽ 0.03), 1246Y (167/201, 83.1%, to 120/132, 90.9%; P ⫽ 0.04), and these two mutations together (164/201, 81.6%, to 119/132, 90.2%; P ⫽ 0.03; Fig. 1). I…
Sulfamethoxazole susceptibility of Mycobacterium tuberculosis isolates from HIV-infected Ugandan adults with tuberculosis taking trimethoprim-sulfamethoxazole prophylaxis	Ogwang S, Good CE, Okware B, Nsereko M, Jacobs MR, Boom WH, Bark CM.	26169400	Antimicrob Agents Chemother. 2015 Sep;59(9):5844-6. doi: 10.1128/AAC.01101-15. Epub 2015 Jul 13.	Ogwang S	Antimicrob Agents Chemother	2015	2015-07-15	PMC4538550		10.1128/AAC.01101-15			uganda	ANTIBACTERIAL	antibacterial	HUMAN	human	field study	surveillance
Short report: Dynamics of Plasmodium falciparum malaria after sub-optimal therapy in Uganda	Myrick A, Leemann E, Dokomajilar C, Hopkins H, Dorsey G, Kamya MR, Rosenthal PJ.	16687676	Am J Trop Med Hyg. 2006 May;74(5):758-61.	Myrick A	Am J Trop Med Hyg	2006	2006-05-12					kampala	uganda	ANTIMALARIAL	antimalarial	HUMAN	human	field study	resistance genes	Two patients showed shifts from mixed to mutant genotypes of dhfr 59, one from wild-type to mutant for dhps 437 and dhps 540 and mutant to mixed for dhfr 59, and one from mixed to mutant for dhps 437 and dhps 540. Although numbers for this analysis were small, the results suggest se- lection for resistance by CQ/SP
Neonatal sepsis at Mulago national referral hospital in Uganda: Etiology, antimicrobial resistance, associated factors and case fatality risk	Tumuhamye J, Sommerfelt H, Bwanga F, Ndeezi G, Mukunya D, Napyo A, Nankabirwa V, Tumwine JK.	32776958	PLoS One. 2020 Aug 10;15(8):e0237085. doi: 10.1371/journal.pone.0237085. eCollection 2020.	Tumuhamye J	PLoS One	2020	2020-08-11	PMC7416959		10.1371/journal.pone.0237085		kampala	uganda	ANTIBACTERIAL	antibacterial	HUMAN	human	field study	surveillance
Antimicrobial resistance at the human-animal interface in the Pastoralist Communities of Kasese District, South Western Uganda	Iramiot JS, Kajumbula H, Bazira J, Kansiime C, Asiimwe BB.	32895433	Sci Rep. 2020 Sep 7;10(1):14737. doi: 10.1038/s41598-020-70517-w.	Iramiot JS	Sci Rep	2020	2020-09-08			10.1038/s41598-020-70517-w		kasese	uganda	ANTIBACTERIAL	antibacterial	ONEHEALTH	onehealth	field study	surveillance
Recovery and stable persistence of chloroquine sensitivity in Plasmodium falciparum parasites after its discontinued use in Northern Uganda	Balikagala B, Sakurai-Yatsushiro M, Tachibana SI, Ikeda M, Yamauchi M, Katuro OT, Ntege EH, Sekihara M, Fukuda N, Takahashi N, Yatsushiro S, Mori T, Hirai M, Opio W, Obwoya PS, Anywar DA, Auma MA, Palacpac NMQ, Tsuboi T, Odongo-Aginya EI, Kimura E, Ogwang M, Horii T, Mita T.	32070358	Malar J. 2020 Feb 18;19(1):76. doi: 10.1186/s12936-020-03157-0.	Balikagala B	Malar J	2020	2020-02-20	PMC7026951		10.1186/s12936-020-03157-0		gulu	uganda	ANTIMALARIAL	antimalarial	HUMAN	human	field study	resistance genes	prevalence, Allele prevalence and frequency of pfcrt and pfmdr1 polymorphisms, In pfcrt, the prevalence of chloroquine-resistant alleles (CVIET allele; amino acid position 72–76, mutation underlined) signifcantly decreased from 28.8% in 2013 to 1.1% in 2016 and fnally could not be detected in 2017.
